# Supplementary material for: The effect of interactive ozone chemistry on weak and strong stratospheric polar vortex events
Source: Copernicus journal article supplement (doi:10.5194/acp-2020-187), 2020-03-12
Supplement: Supplementary file [file acp-2020-187-AC1-supplement.pdf]

# The effect of interactive ozone chemistry on weak and strong stratospheric polar vortex events

Jessica Oehrlein<sup>1</sup>, Gabriel Chiodo<sup>1,2</sup>, and Lorenzo M. Polvani<sup>1</sup>

<sup>1</sup>Department of Applied Physics & Applied Mathematics, Columbia University, New York, United States

<sup>2</sup>Department of Environmental Systems Science, Institute for Atmospheric and Climate Science, ETH Zurich, Switzerland

**Correspondence:** Jessica Oehrlein (jessica.oehrlein@columbia.edu)

**Abstract.** Modeling and observational studies have reported effects of stratospheric ozone extremes on Northern Hemisphere spring climate. Recent work has further suggested that the coupling of ozone chemistry and dynamics amplifies the surface response to midwinter sudden stratospheric warmings (SSWs). Here, we study the importance of interactive ozone chemistry in representing the stratospheric polar vortex and Northern Hemisphere winter surface climate variability. We contrast two simulations from the interactive and specified chemistry (and thus ozone) versions of the Whole Atmosphere Community Climate Model, designed to isolate the impact of interactive ozone on polar vortex variability. In particular, we analyze the response with and without interactive chemistry to midwinter SSWs, March SSWs, and strong polar vortex events (SPVs). With interactive chemistry, the stratospheric polar vortex is stronger, and more SPVs occur, but we find little effect on the frequency of midwinter SSWs. At the surface, interactive chemistry results in a pattern resembling a more negative North Atlantic Oscillation following midwinter SSWs, but with little impact on the surface signatures of late winter SSWs and SPVs. These results suggest that including interactive ozone chemistry is important for representing North Atlantic and European winter climate variability.

## 1 Introduction

The climate impacts of stratospheric ozone extremes, particularly Antarctic ozone depletion, have been widely studied (Previdi and Polvani (2014) and references therein). While the effects are clearer and larger in the Southern Hemisphere ~~due to greater ozone depletion~~, ozone extremes have also been shown to ~~induce~~ be associated with springtime surface anomalies in the Northern Hemisphere (~~Calvo et al., 2015; Ivy et al., 2017~~) (Smith and Polvani, 2014; Calvo et al., 2015; Ivy et al., 2017).

~~The weaker ozone depletion in the Northern Hemisphere is partially due to greater interannual variability~~ Polar cap ozone anomalies are strongly related to interannual variability in stratospheric polar vortex strength, which is larger in the Northern Hemisphere than the Southern Hemisphere. This is a result of the larger amplitudes of upward-propagating planetary waves, which perturb the stratospheric circulation. Years with low wave activity tend to ~~a~~ correspond to a stronger vortex and a weaker Brewer-Dobson Circulation (BDC), resulting in weaker ozone transport from the tropics into the poles and decreased mixing across the vortex edge, as well as enhanced formation of polar stratospheric clouds, which contribute to increased springtime destruction of ozone. Years with high wave activity correspond to a weaker vortex and a stronger BDC, with

25 stronger ozone transport from the tropics and ~~temperatures too high for polar stratospheric clouds to form~~increased mixing  
(Newman et al., 2001).

These processes are well-represented in fully interactive chemistry-climate models (Strahan and Douglass, 2004). However, such models are computationally expensive compared to the more common ones, in which stratospheric ozone is simply prescribed. A number of studies have explored the importance of interactive ozone chemistry on model representations of  
30 coupled stratosphere-troposphere variability. Smith and Polvani (2014) and Karpechko et al. (2014) found little impact of stratospheric ozone extremes on surface climate in the Northern Hemisphere using prescribed zonal mean monthly mean ozone fields. However, Calvo et al. (2015) found robust surface impacts associated with stratospheric ozone extremes using an interactive chemistry-climate model, suggesting the potential importance of this coupling. Further model studies are needed to disentangle the effects of ozone from those of polar vortex variability.

35 While the effect of polar stratospheric clouds on ozone is mainly seen in the spring when sunlight returns to the region, the variability of the polar vortex can result in wintertime ozone anomalies which may have surface impacts. The most extreme states of the polar vortex are sudden stratospheric warmings (SSWs) and strong polar vortex events (SPVs). Leading up to an SSW, dynamical forcing disrupts the stratospheric circulation, eventually resulting in a reversal of zonal mean zonal wind throughout much of the polar stratosphere. SSWs have surface effects for the two months following, particularly a negative  
40 North Atlantic Oscillation and cold anomalies over much of Northern Eurasia. SPVs, as the result of a lack of planetary wave activity, are not dynamical events in the same way as SSWs (Limpasuvan et al., 2004, 2005) but may still have surface impact (a positive NAO) (Baldwin and Dunkerton, 2001).

For the dynamical reasons described above, SSWs and SPVs tend to be associated with the occurrence of positive and negative stratospheric ozone anomalies, respectively. About two weeks prior to an SSW, the BDC accelerates, resulting in  
45 adiabatic warming of the stratosphere and enhanced isentropic eddy transport of ozone and thus increased ozone concentration over the pole (De La Cámara et al., 2018). SPVs are similarly accompanied by an anomalously weak BDC because of the lack of planetary wave activity and thus an anomalously low transport of ozone, as well.

Because they affect both stratospheric ozone and the NAO in the troposphere, extreme vortex events offer an ideal case in which to study wintertime surface impacts of ozone chemistry. Haase and Matthes (2019) studied the impact of interactive  
50 versus prescribed ozone on SSWs, as well as their ~~their~~ surface effects, in simulations of the recent past (1955-present) in an earth system model. They compared results of a simulation with interactive ozone to those of a simulation with ~~ozone~~  
~~prescribed~~prescribed ozone. This prescribed ozone was given daily (with no averaging/climatology) from ~~the~~a single historical interactive chemistry simulation. They found a stronger climatological vortex in the interactive chemistry simulation, and this was associated with a decreased SSW frequency. Further, SSWs were followed by stronger and more persistent surface  
55 anomalies in the simulation with interactive chemistry. These results suggest important surface impacts of ozone chemistry. However, their simulation was relatively short (64 winters), and the historical period they simulated includes long-term trends in ozone that may affect the results. Also, their method of prescribing ozone means that the ozone in the specified chemistry simulation was associated with dynamical variability of the interactive chemistry run, and that variability was inconsistent with the dynamical state of the specified chemistry model.

60 Building on the study of Haase and Matthes (2019), we here study interactions between ozone chemistry and polar vortex  
variability by analyzing SSWs, SPVs, and their surface impacts in two 200-year timeslice simulations with fully interactive  
and prescribed chemistry versions of a model. Using 200-year timeslices provides us with a large sample size of SSW and  
SPV events without long-term ozone trends, and we prescribe ozone based on the ozone climatology from the 200 years of the  
interactive chemistry simulation. ~~This~~ Due to the larger sample size, climatological ozone distribution, and constant forcings,  
65 this set of simulations more clearly separates the impact of ozone ~~on the~~ 's interannual variation on stratosphere-troposphere  
coupling, ~~via its interannual variation~~. While we do not see decreased SSW frequency with interactive chemistry, we confirm  
Haase and Matthes (2019)'s results on the vortex climatology and response to midwinter SSWs. We further find that there is  
little surface effect of interactive ozone chemistry immediately following SPVs or March SSWs. However, SPVs show long-  
lasting effects on stratospheric ozone, with anomalies 1-2 months after the central date of a similar magnitude to those caused  
70 by midwinter SSWs.

The paper is organized as follows. Section 2 describes the model, simulations, and methodologies. Section 3 addresses our  
results on the impacts of interactive chemistry, considering the stratospheric mean state, midwinter SSWs, March SSWs, and  
SPVs. We conclude the paper with a discussion of these results.

## 2 Methods

75 In this study, we analyze model integrations performed with the Whole Atmosphere Community Climate Model, Version 4  
(WACCM4), one atmospheric component of the Community Earth System Model (CESM1) (Marsh et al., 2013). WACCM4  
is an interactive chemistry-climate model with a horizontal resolution of  $1.9^\circ$  in latitude and  $2.6^\circ$  in longitude, 66 vertical  
levels, and a model top at  $5.1 \times 10^{-6}$  hPa (140 km). Northern Hemisphere stratospheric variability, such as the frequency and  
dynamical features of SSWs, are accurately simulated in WACCM4 (Marsh et al., 2013).

80 We perform two model integrations, both 200-year-long timeslice integrations with forcings at constant year-2000 values to  
avoid long-term trends in ozone. One model integration uses the fully interactive chemistry scheme in WACCM4 (Kinnison  
et al., 2007). We refer to this simulation as the CHEM simulation in the analysis. The other uses the "Specified Chemistry"  
version of WACCM, known as SC-WACCM (Smith et al., 2014). ~~In the SC-WACCM~~ We refer to this prescribed chemistry  
simulation as the NOCHEM simulation in the analysis. In the NOCHEM simulation, ozone concentrations (and ~~a few~~ other  
85 radiatively active atmospheric constituents, ~~e.g. CH<sub>4</sub>~~ including CFCs) are prescribed using zonally symmetric, monthly mean,  
seasonal climatology computed from the WACCM integration. These zonally symmetric monthly ozone fields are read into SC-  
WACCM and interpolated linearly to the day of the year. More details can be found in Smith et al. (2014). ~~Using the climatology~~  
~~to specify ozone minimizes the effect of ozone extremes in particular years of the interactive chemistry simulation on results of~~  
~~the simulation with prescribed chemistry. We refer to this prescribed chemistry simulation as the NOCHEM simulation in the~~  
90 ~~analysis.~~ Hence, both CHEM and NOCHEM strictly impose identical year 2000 forcings for all radiatively active species, and  
only differ in their treatment of ozone. The use of climatological ozone fields in NOCHEM removes the effect of extreme ozone  
variations on the climate system. One might consider specifying non-zonally symmetric ozone (Haase and Matthes, 2019), but

that comes at cost of a major physical inconsistency between the polar vortex and the ozone field: in other words the extreme ozone years in the model will not correspond with the unperturbed vortex years. More importantly, the vast majority of climate models in CMIP specify zonally symmetric stratospheric ozone, including within CMIP6 (Keeble et al., 2020): hence the zonally-symmetric specified ozone case is the one of most interest in terms of evaluating the impact of interactive ozone chemistry.

We identify SSWs in the model output following the definition in Charlton and Polvani (2007a) (see the corrigendum Charlton-Perez and Polvani (2011)). We define an SSW as a reversal of zonal mean zonal wind at 60° N and 10 hPa from westerly to easterly during November through March, with the central date being the first day of easterly zonal mean zonal winds. No later date can be a central date until the winds have been westerly again for at least 20 days, and the winds must return to westerly for at least 10 consecutive days before April 30 (thus discarding stratospheric final warmings). This definition is optimal for identifying SSWs, as described by Butler and Gerber (2018). We focus on SSWs occurring in December-February and in March. We consider March events separately from December-February events due ~~both~~ to different shortwave heating behavior ~~and to~~ model bias in March SSW frequency (too frequent SSWs in our model), and different NAO structure in early spring compared to winter.

To the best of our knowledge, there is no standard definition of an SPV. Different methods have been used in the literature (Limpasuvan et al., 2004; Tripathi et al., 2015; Scaife et al., 2016; Beerli and Grams, 2019). We here follow the definition used in Scaife et al. (2016) and Smith et al. (2018), designed to be analogous to the Charlton and Polvani (2007a) SSW definition and to result in a similar number of events in reanalysis. We define an SPV as zonal mean zonal wind at 60° N and 10 hPa reaching 48 m/s or higher (westerly) during November through March, with the central date being the first day of zonal mean zonal winds above 48 m/s. No later date can be a central date until the winds return below 48 m/s for at least 20 consecutive days. We focus on SPVs occurring in December-February, due to low event frequency in November and March. A separate analysis reveals that results are not sensitive to using a 41.2 m/s threshold as in Tripathi et al. (2015).

The results we present here are based on composites of daily model output for climate variables, with composites centered around SSW or SPV central dates.

For composites from either CHEM or NOCHEM simulations, we calculate significance using a Monte Carlo test based on 5000 randomly chosen central dates. We also consider the difference in CHEM or NOCHEM composites, denoted CHEM-NOCHEM; for these, we calculate significance from a two-sided two-sample t-test.

## **3 Impact of interactive chemistry**

### **3.1 Stratospheric mean state and extreme events**

We first consider the effect of interactive chemistry on the mean state of the stratosphere by examining the climatological Northern Hemisphere 10 hPa zonal mean zonal wind (Figure 1). We find stronger westerlies in CHEM than in NOCHEM in the vortex formation stage (September and early October) and in the latter half of winter (January-April), between 60° – 80° N. In line with this, we also find weaker downwelling in winter in the upper latitudes in CHEM than in NOCHEM (not shown).

This relative strength in CHEM in late winter also corresponds to a delayed final warming by 7 days on average(not shown). These results are consistent with those found by Haase and Matthes (2019). ~~The same is~~ Similar results are found using six 1955-2005 historical integrations of WACCM and SC-WACCM (with ozone specified monthly or daily from the WACCM climatology) from Neely et al. (2014) (not shown), further indicating that this feature is robust. This is not the case in Smith et al. (2014), where the vortex under constant year 1850-conditions was found to be of similar strength with interactive and specified-chemistryprescribed ozone. The difference in strength of the vortex with interactive vs. ~~specified-chemistry-is then partially prescribed ozone chemistry may be~~ related to forcings used (year 2000 in this study, ~~and~~ 1955-present historical in Haase and Matthes (2019) ~~); and Neely et al. (2014), but 1850 in Smith et al. (2014)); lower ozone variability in the absence of CFCs (Calvo et al., 2015) might limit the effects of any ozone-dynamics feedbacks, the details of which will be investigated in a further study.~~

Because we identify extreme stratospheric events using zonal mean zonal winds at 10 hPa and  $60^{\circ}\text{N}$  (U1060) (Charlton and Polvani, 2007a; Butler and Gerber, 2018), we next examine the mean state and variability of this quantity in CHEM and NOCHEM. Figure 2 shows the two distributions of U1060 in December through March. The average difference in DJFM between CHEM and NOCHEM is about 1.7 m/s; ~~a small but statistically significant difference; Figure 1 indicates that this difference is larger in January through March.~~ To determine whether this is statistically significant, we consider the average zonal mean zonal winds over each winter and treat the winters as independent. A two-sample, two-tailed Welsh's t-test of DJFM average winds in CHEM and NOCHEM yields a p-value of 0.023, so the difference, though small, is significant at a 95% level. The CHEM distribution also has a longer right tail. ~~This, which~~ is consistent with the polar vortex being stronger overall with interactive chemistry. It also indicates that we should expect more SPVs in CHEM than in NOCHEM. While there are fewer days of weak westerlies (0-20 m/s) in CHEM than in NOCHEM, the numbers of days of easterlies are similar, so we expect less of a difference in SSW frequency between the two simulations.

Indeed, this is what we find when we calculate the frequencies of weak and strong vortex events in the CHEM and NOCHEM simulations (Table 1). We consider December-February (DJF, midwinter) and March (late winter) separately for two reasons. First, the ozone impacts in midwinter are different from those in late winter/early spring, as shortwave effects become important in spring. Second, our model is biased in March, with too many SSWs compared to reanalysis, a feature also seen in more recent versions of this model (Gettelman et al., 2019). We see 1.4 March SSWs per decade in NOCHEM and 1.95 March SSWs per decade in CHEM compared to 0.87-1.1 per decade in the reanalysis (Butler et al., 2017).

The stronger vortex in midwinter in the CHEM simulation might lead us to expect fewer DJF SSWs in CHEM than in NOCHEM. We do see a decrease of about 10% in DJF SSWs with interactive chemistry compared to specified chemistry, but this decrease is far from being statistically significant. In contrast, in March, we see more SSWs in CHEM than in NOCHEM, potentially related to the later breakdown of the vortex.

Haase and Matthes (2019) consider the overall (November-March) number of SSWs. They report a decrease in overall SSWs with interactive chemistry of around 30%. In contrast, for November-March, we find ~~a slight increase in SSWs of about 2% (from virtually no difference in SSWs (109 events to vs 111, not shown) from prescribed chemistry to interactive chemistry.~~ in CHEM and NOCHEM. We note that both of these frequencies, around 5.5 events per decade, are on the lower end of

what is seen across reanalyses (Butler et al., 2017; Cao et al., 2019) but very well within the spread among state-of-the-art chemistry-climate models (Ayarzagüena et al., 2018).

We now consider SPV frequency. The increase in DJF SPV frequency from NOCHEM to CHEM is about 29%. This is unsurprising given the stronger vortex in CHEM overall. With our definition of SPVs, the number of March strong vortex events (in either simulation) is too small for a robust statistical analysis. This is because of the weaker vortex in March compared to DJF; a much larger anomalous vortex strength would be necessary to reach 48 m/s. Because of the low number of such events, we do not further study March SPVs and thus discard them from the analysis.

We now examine DJF SSWs, March SSWs, and DJF SPVs separately in each of the following three sections.

### 3.2 Midwinter sudden stratospheric warmings

We start by focusing on the surface impacts of SSWs, seeking to document any differences between the CHEM and NOCHEM simulations. After noting the impact of the events on the surface, we then consider how any differences in those impacts arise aloft.

Figure 3 shows composite surface level pressure anomalies in the first and second months (top and bottom respectively) following December-February SSWs in CHEM (left, 75 events) and NOCHEM (middle, 67 events), as well as the difference between the two (right). We see a strong and significant pattern resembling a negative North Atlantic Oscillation (NAO) in the first month following SSWs in both CHEM and NOCHEM, and in both cases this negative annular mode persists through the second month following the event. There is minimal difference between the two simulations in the first 30 days, with the CHEM simulation having only a slightly stronger signal. However, the difference is statistically significant and strongly projects onto the NAO 30-60 days after the central date. This indicates that the surface signature of SSWs is stronger and more persistent in CHEM than in NOCHEM.

To determine whether ~~these anomalies originate in~~ the differences at the surface following SSWs in CHEM and NOCHEM are a result of differences originating in the stratosphere, we calculate the Northern Annular Mode (NAM) for ~~CHEM and NOCHEM~~ each simulation. We use a method similar to that of Gerber et al. (2010) and Gerber and Martineau (2018); the detailed procedure is in Appendix A. We show the results of the NAM calculations in Figure 4. The CHEM and NOCHEM composites around SSWs have comparable NAM anomalies in the stratosphere around the central date, but in the CHEM simulation the negative anomaly persists more strongly in the lower stratosphere beyond 40 days after the central date. The CHEM-NOCHEM difference shows that this change in persistence with interactive chemistry is significant at the 95% level. There is also more descent of the anomaly to the surface in the CHEM simulation, especially at about 30 days after the central date.

This difference in descent is also seen in the CHEM-NOCHEM temperature anomalies (Figure 5~~top-left~~a). The warming in the stratosphere associated with the onset of the SSW is larger with interactive chemistry. This stratospheric temperature anomaly then descends more strongly through the stratosphere and troposphere in the CHEM simulation than in the NOCHEM simulation.

We investigate the processes leading to these changes in more detail by examining the dynamical, longwave, and shortwave heating terms. The greater warming throughout the stratosphere is due to increased dynamical heating (~~top-right~~Figure 5b) in CHEM compared to NOCHEM, ~~perhaps because of greater wave activity necessary for an SSW to occur with a stronger mean-vortex-state,~~ as the higher temperature with interactive chemistry is also associated with a longwave cooling response (~~bottom-left~~Figure 5c). The higher stratospheric ~~tempertaures~~ temperatures result in greater longwave emission. The increase in dynamical forcing also corresponds to increased ozone transport. Ozone is a longwave emitter, so the increased dynamical forcing could directly account for part of this longwave cooling difference, as well.

The increased dynamical heating in CHEM could be related to greater wave activity necessary for an SSW to occur with a stronger mean vortex state. Figure 6 shows the eddy heat flux over 40-80° N over time in CHEM and NOCHEM. This is stronger by about 2 mK/s around the central date in CHEM than in NOCHEM, indicating a slightly stronger wave forcing in CHEM. The CHEM and NOCHEM means are at the upper and lower bounds of the other's confidence intervals, respectively. Further, the zonal mean zonal winds at 10 hPa and 60° N around the central date of the SSW (shown in Figure 7) are both stronger prior to the event and more easterly following the central date in CHEM than in NOCHEM. However, the residual vertical velocity anomalies leading up to SSWs is nearly identical for CHEM and NOCHEM (not shown), so the increased dynamical heating in CHEM might be a result of a stronger vertical temperature gradient related to the stronger vortex in this simulation (associated with a colder polar stratosphere).

In DJF, the dynamical heating and the longwave heating are the dominant temperature tendency terms. There is also a significant shortwave heating response (~~bottom-right~~Figure 5d), but in midwinter it is an order of magnitude smaller than the other terms, owing to the absence of incoming solar radiation to polar night. The structure in height and time is related to integrated effects of the ozone anomalies following the SSW, which show a similar structure (Kiesewetter et al., 2010). The importance of the shortwave response increases the later in winter the SSW events occurs. We illustrate this in Figure ??, ~~showing the difference in shortwave anomalies between S1, showing much stronger differences in~~ CHEM and NOCHEM ~~for SSWs occurring in December, January, and February separately. There is very little difference in shortwave heating anomalies in CHEM compared to NOCHEM for December SSWs, with no difference greater than 0.05 K/day. The difference increases in January, with differences between 0.125 and 0.15 K/day in the upper stratosphere 20-30 days after the central date, but this is still small compared to the dynamical heating and longwave terms. Much stronger differences are seen for February SSWs, with CHEM-NOCHEM differences throughout the upper stratosphere following the central date of comparable magnitude to the differences in longwave heating anomalies of approximately 0.3 K/day. shortwave anomalies for February SSWs than for December or January events.~~

Finally, we examine the anomaly in total ozone column around the central date of the SSW (Figure 7) in the CHEM simulation. ~~The figure also shows the zonal mean zonal wind to illustrate the corresponding evolution of the vortex.~~ We see a sharp increase in ozone in the 15 days leading up to the central date, reaching a peak of on average about 40 Dobson units above climatology just after the central date, similar to that seen in reanalysis and a similar model by De La Cámara et al. (2018). This ozone anomaly results from transport due to the greater dynamical forcing in CHEM noted earlier. Following the central date, anomalies of about 20 Dobson units persist for up to 3 months following the central date. This ozone anomaly is consistent with



total ozone column in reanalysis ~~reported by De La Cámara et al. (2018) and~~ and a similar model (De La Cámara et al., 2018)  
230 and the smaller ozone depletion in years with early SSWs observed by Strahan et al. (2016).

### 3.3 March sudden stratospheric warmings

We now turn to the March SSWs. Figure 8 shows the composite sea level pressure anomalies for CHEM and NOCHEM, as well as the CHEM-NOCHEM difference, for each of the first two months following the central date. Both simulations again show a negative NAO-like pattern in the two months following the SSW. There are some regions with significant difference  
235 between CHEM and NOCHEM in the first thirty days, but the pattern does not project strongly onto the NAO. Also, there is very little difference between the two composites in the second thirty days after the central date.

The surface responses seen following March SSWs, in both models, are weaker and less persistent than those following DJF SSWs, and the areas of strong or significant low or high anomalies are smaller. ~~This indicates either weaker SSWs~~ Three factors could contribute to this: weaker SSWs, weaker stratosphere-troposphere coupling, and a shorter NAM decorrelation timescale  
240 in March than in DJF ~~or weaker stratosphere-troposphere coupling~~ (Baldwin et al., 2003; Simpson et al., 2011), resulting in weaker anomalies at the surface when averaged over several weeks. The differences between surface impacts of SSWs in CHEM and NOCHEM are also weaker for March SSWs. Thus, ~~ozone chemistry~~ interactive ozone seems much less important for the surface effects of March SSWs than for DJF SSWs.

Considering the NAM in these simulations as shown in Figure ~~??S2~~, we see negative NAM anomalies at the surface in both  
245 the CHEM and NOCHEM simulations, consistent with the negative NAO-like pattern seen in the Figure 8. There is a stronger signal in the troposphere in the CHEM compared to NOCHEM March SSW simulations at around 15-20 days after the central date, which may correspond to the surface pressure differences.

~~As for the surface plots, the NAM anomalies again~~ The NAM anomalies suggest that March SSWs in both CHEM and NOCHEM are weaker overall than the DJF SSWs; the stratospheric NAM anomalies are smaller and less significant. The eddy  
250 heat flux show in Figure S3, however, shows weaker wave forcing preceding only the CHEM (not the NOCHEM) March SSWs compared to those in DJF. Stratosphere-troposphere coupling also seems weaker compared to that seen for DJF SSWs. Further, the difference in ~~this the NAM~~ descent between CHEM and NOCHEM is less strong and persistent than the difference ~~in NAM signals seen in the troposphere seen~~ after midwinter SSWs.

Soon after the central date for March SSWs, the NAM signal in the stratosphere is weaker with ~~interactive chemistry than~~  
255 ~~with specified chemistry~~ CHEM than NOCHEM, in contrast to the midwinter SSW case. This difference appears to arise from the temperature and heating anomalies (Figure ~~??S4~~). The lower stratosphere is only briefly and weakly warmer in CHEM compared to NOCHEM. Shortwave heating seems to be dominant in the temperature response to March SSWs, with the CHEM-NOCHEM difference in temperature anomalies (Figure ~~??aS4a~~) largely following the difference in shortwave heating anomalies (Figure ~~??dS4d~~). This is in contrast to the DJF SSWs, where the shortwave heating had little effect, and dynamical  
260 heating was dominant.

Finally, we note that unlike the DJF SSW case, the ozone anomaly for March SSWs does not persist after the event (Figure 9). This is related to the seasonal breakdown of the vortex, seen in the wind ~~curve~~ curves. Because these are late winter SSWs,



the second month following the central date is near the expected stratospheric final warming date; ~~in our simulations,~~ the winds return to easterly about 50 days ~~on average~~ after the March SSW central date. The ozone anomaly returns to 0 Dobson units as the vortex breaks down. The maximum ozone anomaly is also about half the size of the maximum anomaly seen in DJF, consistent with the weaker nature of the March SSW events overall.

### 3.4 Midwinter strong polar vortex events

Finally, we turn our attention to strong polar vortex (SPV) events in DJF. While less extensively studied than SSWs, SPVs also impact surface climate. Baldwin and Dunkerton (2001) suggest that strong polar vortex events can have surface signals comparable to but opposite in sign to those following SSWs, and Smith et al. (2018) found effects of Northern Hemisphere SPVs on spring and summer Arctic sea ice.

In the thirty days following the SPV central date, we see a pattern reminiscent of a weakly positive NAO in both CHEM and NOCHEM (Figure 10). This positive NAO-like pattern appears stronger in CHEM than in NOCHEM, but not significantly so. There is very little difference from climatology at the surface in the second month after the event in either of the simulations. This minimal difference using interactive versus specified ozone compared to the difference seen with SSWs may be related to the more zonal nature of SPVs. We specify ozone in a zonally-symmetric way, which is much more consistent with the vortex seen in an SPV than in an SSW.

The NAM anomalies following SPVs in CHEM and NOCHEM (Figure ~~??S5~~) have similar strength (and opposite sign) in the stratosphere to those following midwinter SSWs, but they have much weaker downward propagation, consistent with an only weakly positive NAO. The difference between the NAM anomalies in CHEM and NOCHEM confirms a more positive NAM in mid-to-lower troposphere in the first month following the SPV central date with interactive chemistry, but again, this difference is not significant and does not reach the surface.

These minimal differences in surface pressure and NAM are consistent with the ~~lack of differences in similarity in the evolution of~~ stratospheric temperature and ~~temperature tendencies~~ heating rates in CHEM and NOCHEM, shown in Figure ~~??~~. ~~A small shortwave heating difference is expected in midwinter, but the longwave and dynamical heating differences are also much smaller than for midwinter SSWs. S6.~~ The only large and significant difference is in stratospheric temperature ~~is~~, 40-60 days following the SPV central date, when the stratosphere is colder with interactive chemistry. This is after zonal mean zonal winds have returned to typical levels and is thus likely related to the stronger mean state of the stratospheric polar vortex with interactive chemistry compared to specified chemistry. ~~However, this does not affect the surface.~~

The zonal mean zonal winds in CHEM and NOCHEM around the SPV central dates further confirm that there is little difference in the strength of these events between CHEM and NOCHEM; the winds follow nearly identical trajectories from 30 days before to 30 days after the central date. We also see a weaker ozone anomaly following SPVs than following SSWs, with a maximum absolute anomaly of about 30 Dobson units compared to 40 (Figure 11). The ozone decrease following SPVs is also much more gradual than the increase seen in DJF SSWs. This is consistent with the fact that SPVs are not strong and sudden dynamical events in the way that SSWs are. As with DJF SSWs, though, the anomaly does persist for three months after the central date.

## 4 Conclusions

The climate model results presented here show an important ~~contribution of interactive ozone chemistry to relationship between~~ interactive ozone, the climatological state of the stratospheric polar vortex ~~and to~~, and the Euro-Atlantic surface impacts of midwinter SSWs. However, ozone chemistry has minimal impact on the surface effects of March SSWs and of midwinter SPVs, despite long-lasting total ozone column anomalies in the latter case. Furthermore, in contrast to the results reported by Haase and Matthes (2019), we do not find significantly fewer SSWs with interactive chemistry, despite the stronger climatological polar vortex. ~~We~~ However, we do find more frequent SPVs, ~~however~~.

The stronger polar vortex mean state with interactive ozone chemistry also affects the surface signature of SSWs. ~~Stronger~~ A possible mechanism is that stronger wave forcing is necessary for an SSW to occur, and the resulting negative NAM propagates to the surface more strongly, as well. This result is also consistent with that reported by Haase and Matthes (2019), though the effects documented here are weaker. In extending this work to consider March SSWs, we found that while the same stronger dynamical forcing is present, the influence of the shortwave heating term in late winter/early spring results in a stratospheric temperature difference of opposite sign, and with little difference at the surface following March SSWs between interactive chemistry and specified chemistry simulations. We also find minimal impact on midwinter surface effects of SPVs; ~~the~~ However, we do see persisting negative ozone anomalies ~~associated with SPVs instead have an~~ that can have an important effect in spring (Ivy et al., 2017).

Previous work (Smith and Polvani, 2014; Calvo et al., 2015; Ivy et al., 2017; Lin et al., 2017; Rieder et al., 2019) has shown the importance of ozone for the stratospheric polar vortex and surface springtime climate variability. Haase and Matthes (2019) further suggested that feedbacks among chemistry and dynamics are important for accurately capturing the response at the surface to SSWs, one of the major drivers of North Atlantic and European winter climate variability. By running longer simulations allowing for a ~~clean~~ cleaner quantification of the impact of interactive ozone, we find that these feedbacks are important for representing impacts of midwinter SSWs. However, we do not find similar importance for describing surface response to March SSWs or DJF SPVs. Our results suggest that including interactive ozone chemistry may have a sizable impact on N.Atlantic and European winter and spring climate variability in models.

Finally, we note that while we have only focused on winter SSWs and SPVs, stratospheric final warmings also have tropospheric effects (Black et al., 2006; Ayarzaguëna and Serrano, 2009; Wei et al., 2007; Hardiman, 2011; Thieblemont et al., 2019; Butler et al., 2019). Those effects are dependent on the timing of the final warming, with earlier final warmings resulting in surface effects more like those seen following SSWs (Ayarzaguëna and Serrano, 2009; Li et al., 2012). Interactive chemistry may thus also affect the representation and surface signature of stratospheric final warmings in models; this will be investigated in a follow-up study.

*Data availability.* All model results are stored and available on the High Performance Storage System (HPSS) at the National Center for Atmospheric Research (NCAR).

Author contributions. GC and LMP designed the model experiment. JO, GC, and LMP decided on the analysis, and wrote the paper. GC  
330 carried out the model simulations. JO performed the data analysis and produced the figures.

Competing interests. The authors declare that they have no conflict of interest.

Acknowledgements. J. Oehrlein is funded by National Science Foundation (NSF) grant DGE 16-44869. G.Chiodo is funded by the SNF  
Ambizione grant PZ00P2-180043. L. M. Polvani is funded by a grant from the NSF to Columbia University. The WACCM and SC-WACCM  
simulations were conducted on the National Center for Atmospheric Research (NCAR) Cheyenne supercomputer.

## 335 **Appendix A**

We calculate the NAM using a method similar to that of Gerber et al. (2010) and Gerber and Martineau (2018). The specific  
procedure is as follows:

1. We average model output to find a time series of daily, zonal mean geopotential height  $Z(t, \lambda, p)$  as a function of time  $t$ ,  
latitude  $\lambda$ , and pressure  $p$ .
- 340 2. For every day and pressure level, we remove the global mean geopotential height  $\bar{Z}^{\text{global}}(t, p)$ . This helps to remove the  
global changes so that the index instead mainly captures meridional differences or shifts (Gerber et al., 2010). (While  
not the case for the simulations used in this study, this step would remove much of the global warming signal if it were  
present.)
3. For each day, latitude, and pressure level, we remove the average for that calendar day over the whole period; that is, we  
345 remove the climatology to find an anomalous height.
4. For each day, latitude, and pressure, we remove the linear trend over the period.
5. For each day and pressure level, we compute a polar cap average. Here we are interested in the NAM, and we take the  
average from 65-90°N. This is a proxy for the annular mode as shown in Baldwin and Thompson (2009).
6. We multiply by -1 so that a positive polar cap geopotential height anomaly yields a negative NAM, for consistency with  
350 the convention of Thompson and Wallace (1998).
7. We normalize the index by its standard deviation at each pressure level.

## References

- Ayarzaguëna, B. and Serrano, E.: Monthly Characterization of the Tropospheric Circulation over the Euro-Atlantic Area in Relation with the Timing of Stratospheric Final Warmings, *Journal of Climate*, 22, 6313–6324, <https://doi.org/10.1175/2009JCLI2913.1>, 2009.
- 355 Ayarzagüena, B., Polvani, L. M., Langematz, U., Akiyoshi, H., Bekki, S., Butchart, N., Dameris, M., Deushi, M., Hardiman, S. C., Jöckel, P., et al.: No robust evidence of future changes in major stratospheric sudden warmings: a multi-model assessment from CCMI, *Atmospheric Chemistry and Physics*, 18, 11 277–11 287, <https://doi.org/10.5194/acp-18-11277-2018>, 2018.
- Baldwin, M. P. and Dunkerton, T. J.: Stratospheric Harbingers of Anomalous Weather Regimes, *Science*, 294, 581–584, <https://doi.org/10.1126/science.1063315>, <http://www.sciencemag.org/cgi/doi/10.1126/science.1063315>, 2001.
- 360 Baldwin, M. P. and Thompson, D. W.: A critical comparison of stratosphere-troposphere coupling indices, *Quarterly Journal of the Royal Meteorological Society*, 135, 1661–1672, 2009.
- Baldwin, M. P., Stephenson, D. B., Thompson, D. W. J., Dunkerton, T. J., Charlton, A. J., and O’Neill, A.: Stratospheric memory and skill of extended-range weather forecas, *Science*, 301, 636–640, <https://doi.org/10.1126/science.1087143>, 2003.
- Beerli, R. and Grams, C. M.: Stratospheric modulation of the large-scale circulation in the Atlantic-European region and its implications for surface weather events, *Quarterly Journal of the Royal Meteorological Society*, <https://doi.org/10.1002/qj.3653>, 2019.
- 365 Black, R. X., McDaniel, B. A., and Robinson, W. A.: Stratosphere-Troposphere coupling during spring onset, *Journal of Climate*, 19, 4891–4901, <https://doi.org/10.1175/JCLI3907.1>, 2006.
- Butler, A. H. and Gerber, E. P.: Optimizing the Definition of a Sudden Stratospheric Warming, *Journal of Climate*, 31, 2337–2344, <https://doi.org/10.1175/JCLI-D-17-0648.1>, <http://journals.ametsoc.org/doi/10.1175/JCLI-D-17-0648.1>, 2018.
- 370 Butler, A. H., Sjöberg, J. P., Seidel, D. J., and Rosenlof, K. H.: A sudden stratospheric warming compendium, *Earth System Science Data*, 9, 63–76, <https://doi.org/10.5194/essd-9-63-2017>, 2017.
- Butler, A. H., Charlton-Perez, A., Domeisen, D. I. V., Simpson, I. R., and Sjöberg, J.: Predictability of Northern Hemisphere Final Stratospheric Warmings and Their Surface Impacts, *Geophysical Research Letters*, 46, 10 578–10 588, <https://doi.org/10.1029/2019GL083346>, 2019.
- 375 Calvo, N., Polvani, L. M., and Solomon, S.: On the surface impact of Arctic stratospheric ozone extremes, *Environmental Research Letters*, 10, 094 003, <https://doi.org/10.1088/1748-9326/10/9/094003>, <http://stacks.iop.org/1748-9326/10/i=9/a=094003?key=crossref.dab5dcc8df2c81f8936a64f51ce43550>, 2015.
- Cao, C., Chen, Y.-H., Rao, J., Liu, S.-M., Li, S.-Y., Ma, M.-H., and Wang, Y.-B.: Statistical Characteristics of Major Sudden Stratospheric Warming Events in CESM1-WACCM: A Comparison with the JRA55 and NCEP/NCAR Reanalyses, *Atmosphere*, 10, <https://doi.org/10.3390/atmos10090519>, 2019.
- 380 Charlton, A. J. and Polvani, L. M.: A New Look at Stratospheric Sudden Warmings. Part I: Climatology and Modeling Benchmarks, *Journal of Climate*, 20, 449–469, <https://doi.org/10.1175/JCLI3996.1>, <http://journals.ametsoc.org/doi/abs/10.1175/JCLI3996.1>, 2007a.
- Charlton, A. J. and Polvani, L. M.: A New Look at Stratospheric Sudden Warmings. Part II: Evaluation of Numerical Modeling Simulations, *Journal of Climate*, 20, 470–488, <https://doi.org/10.1175/JCLI3994.1>, 2007b.
- 385 Charlton-Perez, A. J. and Polvani, L. M.: CORRIGENDUM, *Journal of Climate*, 24, 5951–5951, <https://doi.org/10.1175/JCLI-D-11-00348.1>, <http://journals.ametsoc.org/doi/abs/10.1175/JCLI-D-11-00348.1>, 2011.

- De La Cámara, A., Abalos, M., Hitchcock, P., Calvo, N., and Garcia, R. R.: Response of Arctic ozone to sudden stratospheric warmings, *Atmospheric Chemistry and Physics*, 18, 16 499–16 513, <https://doi.org/10.5194/acp-18-16499-2018>, <https://www.atmos-chem-phys.net/18/16499/2018/>, 2018.
- 390 Gerber, E. P. and Martineau, P.: Quantifying the variability of annular modes: reanalysis uncertainty vs. sampling uncertainty, *Atmospheric Chemistry and Physics*, 18, 17 099–17 117, <https://doi.org/10.5194/acp-18-17099-2018>, 2018.
- Gerber, E. P., Baldwin, M. P., Akiyoshi, H., Austin, J., Bekki, S., Braesicke, P., Butchart, N., Chipperfield, M., Dameris, M., Dhomse, S., Frith, S. M., Garcia, R. R., Garny, H., Gettelman, A., Hardiman, S. C., Karpechko, A., Marchand, M., Morgenstern, O., Nielsen, J. E., Pawson, S., Peter, T., Plummer, D. A., Pyle, J. A., Rozanov, E., Scinocca, J. F., Shepherd, T. G., and Smale, D.: Stratosphere-  
 395 troposphere coupling and annular mode variability in chemistry-climate models, *Journal of Geophysical Research: Atmospheres*, 115, <https://doi.org/10.1029/2009JD013770>, <https://agupubs.onlinelibrary.wiley.com/doi/abs/10.1029/2009JD013770>, 2010.
- Gettelman, A., Mills, M. J., Kinnison, D. E., Garcia, R. R., Smith, A. K., Marsh, D. R., Tilmes, S., Vitt, F., Bardeen, C. G., McInerney, J., Liu, H.-L., Solomon, S. C., Polvani, L. M., Emmons, L. K., Lamarque, J.-F., Richter, J. H., Glanville, A. S., Bacmeister, J. T., Phillips, A. S., Neale, R. B., Simpson, I. R., DuVivier, A. K., Hdzic, A., and Randel, W. J.: The Whole Atmosphere Community Climate Model  
 400 Version 6 (WACCM6), *Journal of Geophysical Research Atmospheres*, <https://doi.org/10.1029/2019JD030943>, 2019.
- Haase, S. and Matthes, K.: The importance of interactive chemistry for stratosphere–troposphere coupling, *Atmospheric Chemistry and Physics*, 19, 3417–3432, <https://doi.org/10.5194/acp-19-3417-2019>, <https://www.atmos-chem-phys.net/19/3417/2019/>, 2019.
- Hardiman, S. C. e. a.: Improved predictability of the troposphere using stratospheric final warmings, *Journal of Geophysical Research Atmospheres*, 116, D18 113, <https://doi.org/10.1029/2011JD015914>, 2011.
- 405 Ivy, D. J., Solomon, S., Calvo, N., and Thompson, D. W. J.: Observed connections of Arctic stratospheric ozone extremes to Northern Hemisphere surface climate, *Environmental Research Letters*, 12, 024 004, <https://doi.org/10.1088/1748-9326/aa57a4>, <http://stacks.iop.org/1748-9326/12/i=2/a=024004?key=crossref.8bb0b7585b138903acc96d5787953e21>, 2017.
- Karpechko, A. Y., Perlwitz, J., and Manzini, E.: A model study of the tropospheric impacts of the Arctic ozone depletion of 2011, *Journal of Geophysical Research*, 119, 7999–8014, <https://doi.org/10.1002/2013JD021350>, 2014.
- 410 Keeble, J., Hassler, B., Banerjee, A., Checa-Garcia, R., Chiodo, G., Davis, S., Eyring, V., Griffiths, P. T., Morgenstern, O., Nowack, P., Zeng, G., Zhang, J., Bodeker, G., Cugnet, D., Danabasoglu, G., Deushi, M., Horowitz, L. W., Li, L., Michou, M., Mills, M. J., Nabat, P., Park, S., and Wu, T.: Evaluating stratospheric ozone and water vapor changes in CMIP6 models from 1850–2100, *Atmos. Chem. Phys. Discuss.*, in review, <https://doi.org/10.5194/acp-2019-1202>, 2020.
- Kiesewetter, G., Sinnhuber, B.-M., Vountas, M., Weber, M., and Burrows, J. P.: A long-term stratospheric ozone data set from assimilation  
 415 of satellite observations: High-latitude ozone anomalies, *Journal of Geophysical Research*, 115, <https://doi.org/10.1029/2009JD013362>, 2010.
- Kinnison, D. E., Brasseur, G. P., Walters, S., Garcia, R. R., Marsh, D. R., Sassi, F., Harvey, V. L., Randall, C. E., Emmons, L., Lamarque, J. F., Hess, P., Orlando, J. J., Tie, X. X., Randel, W., Pan, L. L., Gettelman, A., Granier, C., Diehl, T., Niemeier, U., and Simmons, A. J.: Sensitivity of chemical tracers to meteorological parameters in the MOZART-3 chemical transport model, *Journal of Geophysical  
 420 Research Atmospheres*, 112, D20 302, <https://doi.org/10.1029/2006JD007879>, 2007.
- Li, L., Li, C., Pan, J., and Tan, Y.: On the differences and climate impacts of early and late stratospheric polar vortex breakup, *Advances in Atmospheric Sciences*, 29, 1119–1128, <https://doi.org/10.1007/s00376-012-1012-4>, 2012.
- Limpasuvan, V., Thompson, D. W. J., and Hartmann, D. L.: The Life Cycle of the Northern Hemisphere Sudden Stratospheric Warmings, *Journal of Climate*, 17, 2584–2596, 2004.

- 425 Limpasuvan, V., Hartmann, D. L., Thompson, D. W. J., Jeev, K., and Yung, Y. L.: Stratosphere-troposphere evolution during polar vortex intensification, *Journal of Geophysical Research Atmospheres*, 110, D24 101, <https://doi.org/10.1029/2005JD006302>, 2005.
- Lin, P., Paynter, D., Polvani, L., Correa, G. J. P., Ming, Y., and Ramaswamy, V.: Dependence of model-simulated response to ozone depletion on stratospheric polar vortex climatology: RESPONSE TO OZONE DEPENDS ON CLIMATOLOGY, *Geophysical Research Letters*, 44, 6391–6398, <https://doi.org/10.1002/2017GL073862>, <http://doi.wiley.com/10.1002/2017GL073862>, 2017.
- 430 Marsh, D. R., Mills, M. J., Kinnison, D. E., Lamarque, J.-F., Calvo, N., and Polvani, L. M.: Climate Change from 1850 to 2005 Simulated in CESM1(WACCM), *Journal of Climate*, 26, 7372–7391, <https://doi.org/10.1175/JCLI-D-12-00558.1>, <http://journals.ametsoc.org/doi/abs/10.1175/JCLI-D-12-00558.1>, 2013.
- Neely, R. R., Marsh, D. R., Smith, K. L., Davis, S. M., and Polvani, L. M.: Biases in southern hemisphere climate trends induced by coarsely specifying the temporal resolution of stratospheric ozone, *Geophysical Research Letters*, 41, 8602–8610, <https://doi.org/10.1002/2014GL061627>, <https://onlinelibrary.wiley.com/doi/abs/10.1002/2014GL061627>, 2014.
- 435 Newman, P. A., Nash, E. R., and Rosenfield, J. E.: What controls the temperature of the Arctic stratosphere during the spring?, *Journal of Geophysical Research*, 106, 19 999–20 010, 2001.
- Previdi, M. and Polvani, L. M.: Climate system response to stratospheric ozone depletion and recovery, *Quarterly Journal of the Royal Meteorological Society*, 140, 2401–2419, <https://doi.org/10.1002/qj.2330>, 2014.
- 440 Rieder, H. E., Chiodo, G., Fritzer, J., Wienerroither, C., and Polvani, L. M.: Is interactive ozone chemistry important to represent polar cap stratospheric temperature variability in Earth-System Models?, *Environmental Research Letters*, 14, 044 026, <https://doi.org/10.1088/1748-9326/ab07ff>, <https://doi.org/10.1088/1748-9326/ab07ff>, 2019.
- Scaife, A. A., Karpechko, A. Y., Baldwin, M. P., Brookshaw, A., Butler, A. H., Eade, R., Gordon, M., MacLachlan, C., Martin, N., Dunstone, N., and Smith, D.: Seasonal winter forecasts and the stratosphere, *Atmospheric Science Letters*, 17, 51–56, <https://doi.org/10.1002/asl.598>, 2016.
- 445 Simpson, I. R., Hitchcock, P., Shepherd, T. G., and Scinocca, J. F.: Stratospheric variability and tropospheric annular-mode timescales, *Geophysical Research Letters*, 38, <https://doi.org/10.1029/2011GL049304>, 2011.
- Smith, K. L. and Polvani, L. M.: The surface impacts of Arctic stratospheric ozone anomalies, *Environmental Research Letters*, 9, 074 015, <https://doi.org/10.1088/1748-9326/9/7/074015>, <http://stacks.iop.org/1748-9326/9/i=7/a=074015?key=crossref.f94c7a38992e3fe37e21ee98cf969690>, 2014.
- 450 Smith, K. L., Neely, R. R., Marsh, D. R., and Polvani, L. M.: The Specified Chemistry Whole Atmosphere Community Climate Model (SC-WACCM), *Journal of Advances in Modeling Earth Systems*, 6, 883–901, <https://doi.org/10.1002/2014MS000346>, <http://doi.wiley.com/10.1002/2014MS000346>, 2014.
- Smith, K. L., Polvani, L. M., and Tremblay, L. B.: The Impact of Stratospheric Circulation Extremes on Minimum Arctic Sea Ice Extent, *Journal of Climate*, 31, 7169–7183, <https://doi.org/10.1175/JCLI-D-17-0495.1>, <http://journals.ametsoc.org/doi/10.1175/JCLI-D-17-0495.1>, 2018.
- Strahan, S. E. and Douglass, A. R.: Evaluating the credibility of transport processes in simulations of ozone recovery using the Global Modeling Initiative three-dimensional model, *Journal of Geophysical Research Atmospheres*, 109, D05 110, <https://doi.org/10.1029/2003JD004238>, 2004.
- 460 Strahan, S. E., Douglass, A. R., and Steenrod, S. D.: Chemical and Dynamical Impacts of Stratospheric Sudden Warmings on Arctic Ozone Variability, *Journal of Geophysical Research Atmospheres*, 121, 11 836–11 851, <https://doi.org/10.1002/2016JD025128>, 2016.



- Thieblemont, R., Ayarzagüena, B., Matthes, K., Bekki, S., Abalichin, J., and Langematz, U.: Drivers and Surface Signal of Interannual Variability of Boreal Stratospheric Final Warmings, *Journal of Geophysical Research Atmospheres*, 124, 5400–5417, <https://doi.org/10.1029/2018JD029852>, 2019.
- 465 Thompson, D. W. J. and Wallace, J. M.: The Arctic Oscillation signature in the wintertime geopotential height and temperature fields, *Geophysical Research Letters*, 25, 1297–1300, 1998.
- Tripathi, O. P., Charlton-Perez, A., Sigmond, M., and Vitart, F.: Enhanced long-range forecast skill in boreal winter following stratospheric strong vortex conditions, *Environmental Research Letters*, 10, 104 007, <https://doi.org/10.1088/1748-9326/10/10/104007>, <http://stacks.iop.org/1748-9326/10/i=10/a=104007?key=crossref.ca018ccbe2e43e0823d6e4f874940861>, 2015.
- 470 Wei, K., Chen, W., and Huang, R. H.: Dynamical diagnosis of the breakup of the stratospheric polar vortex in the Northern Hemisphere, *Sci. China Ser. D*, 50, 1369–1379, <https://doi.org/10.1007/s11430-007-0100-2>, 2007.

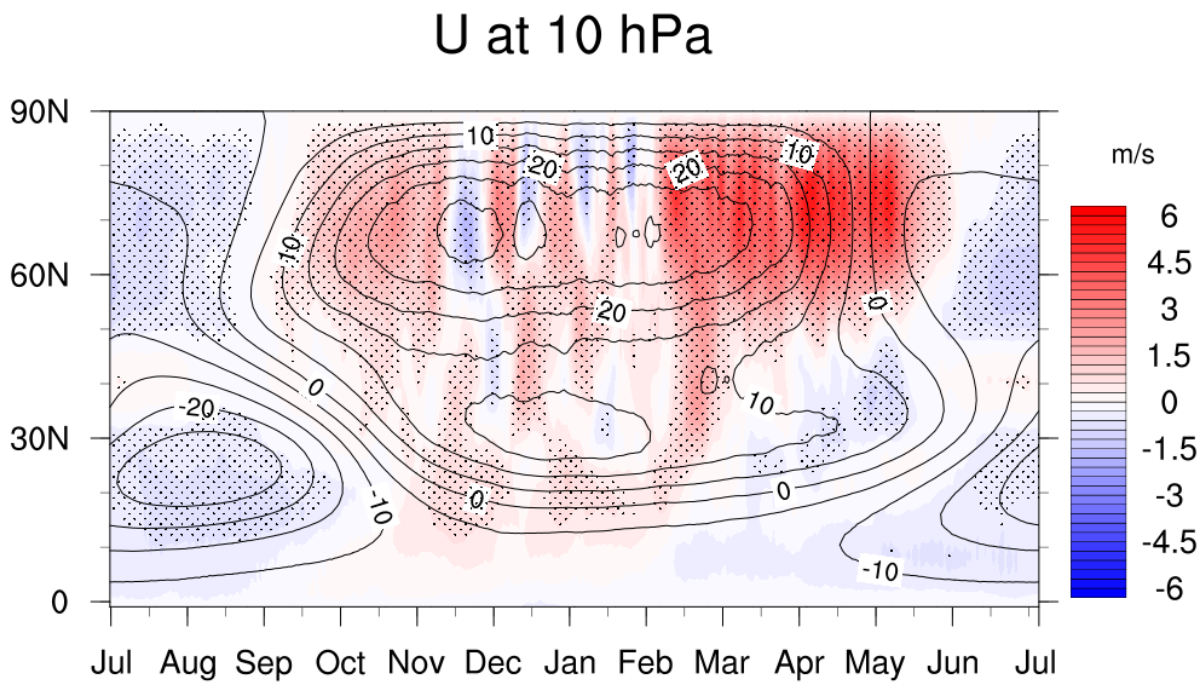

**Figure 1.** Latitude-time plot of zonal mean zonal wind at 10 hPa. Contours show NOCHEM values in m/s. Colored shading shows the difference CHEM-NOCHEM in m/s. Stippling indicates a significant CHEM-NOCHEM difference at a 95% level using a two-sample, two-tailed [Welsh's t-test](#).

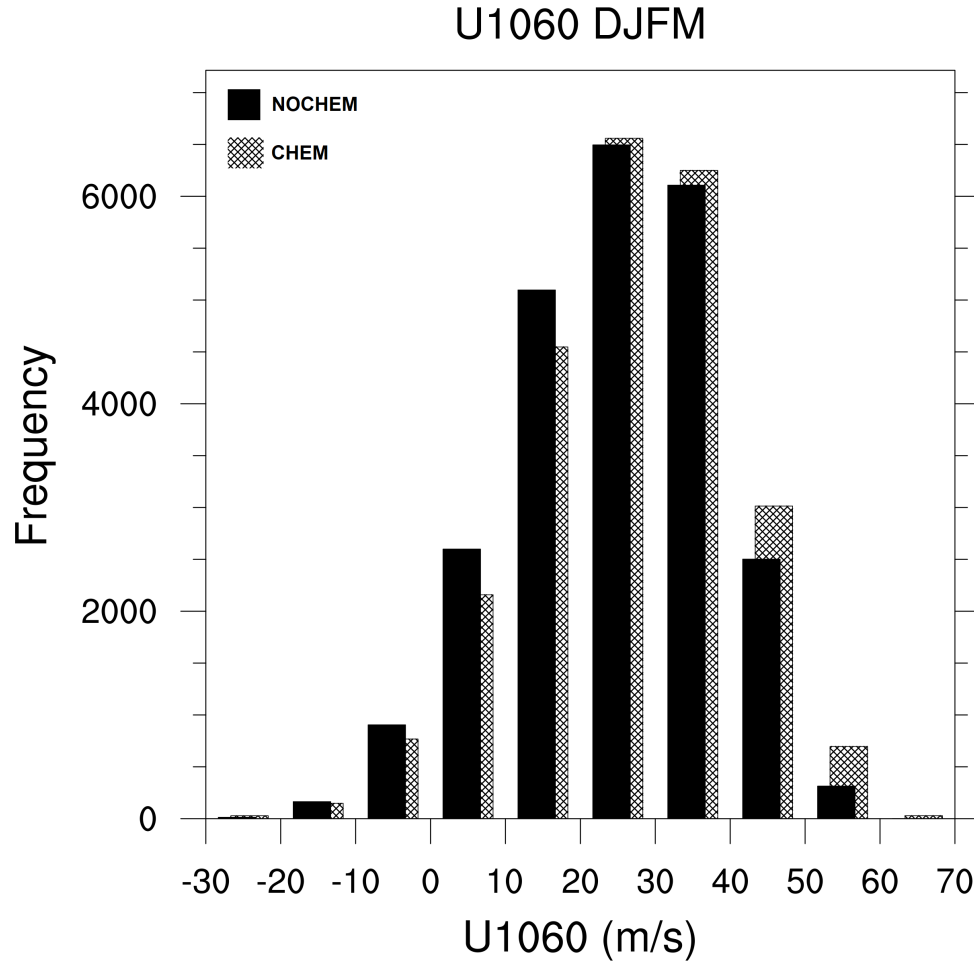

**Figure 2.** Histogram of daily values of zonal mean zonal wind at 10 hPa and 60°N in December-March for CHEM and NOCHEM. The mean and standard deviation of the CHEM and NOCHEM zonal mean zonal wind values are 26.5 26.1 m/s and 12.9 24.4 m/s. For NOCHEM, these values are 25.0 m/s and 12.3 m/s respectively. The shift to a stronger vortex in right tail of the CHEM compared to NOCHEM distribution is statistically significant at the 95% level based on longer, indicating more days of a Kolmogorov-Smirnov test; the difference in means is significant at the 95% level based on a two-sample t-test particularly strong polar vortex.

|                  | NOCHEM | CHEM | Percent Difference | p-value |
|------------------|--------|------|--------------------|---------|
| Total Winters    | 200    | 200  |                    |         |
| DJF SSW events   | 75     | 67   | -10.7%             | 0.45    |
| DJF SPV events   | 58     | 74   | +29.3%             | 0.13    |
| March SSW events | 28     | 39   | +39.3%             | 0.14    |
| March SPV events | 7      | 5    | -28.6%             | 0.58    |

**Table 1.** Summary of sudden stratospheric warming (SSW) and strong polar vortex (SPV) events in 200-year year 2000 timeslices with and without interactive chemistry (CHEM and NOCHEM respectively). We separately consider the events occurring in December through February and those occurring in March. Reported p-values are based on a two-tailed two sample t-test (Charlton and Polvani, 2007b).

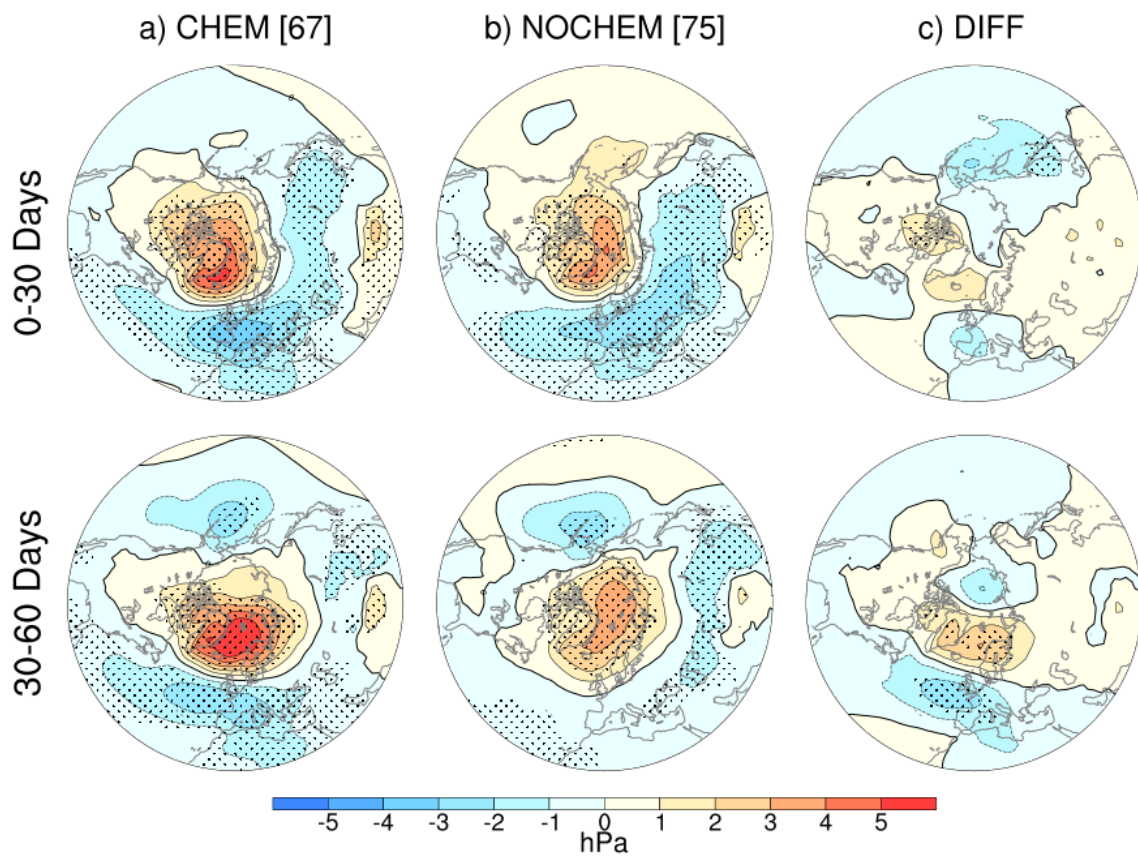

**Figure 3.** Composites of sea level pressure (SLP) anomalies (in hPa) in the 0-30 and 30-60 days following the central date of DJF SSWs in CHEM (WACCM, a) and NOCHEM (SC-WACCM, b) simulations, as well as the difference in the CHEM and NOCHEM composites (c). Significance at the 95% level using a Monte Carlo test (a,b) or a two-sided t-test (c) is indicated by stippling. The number of events included in each composite is noted in brackets above the figures.

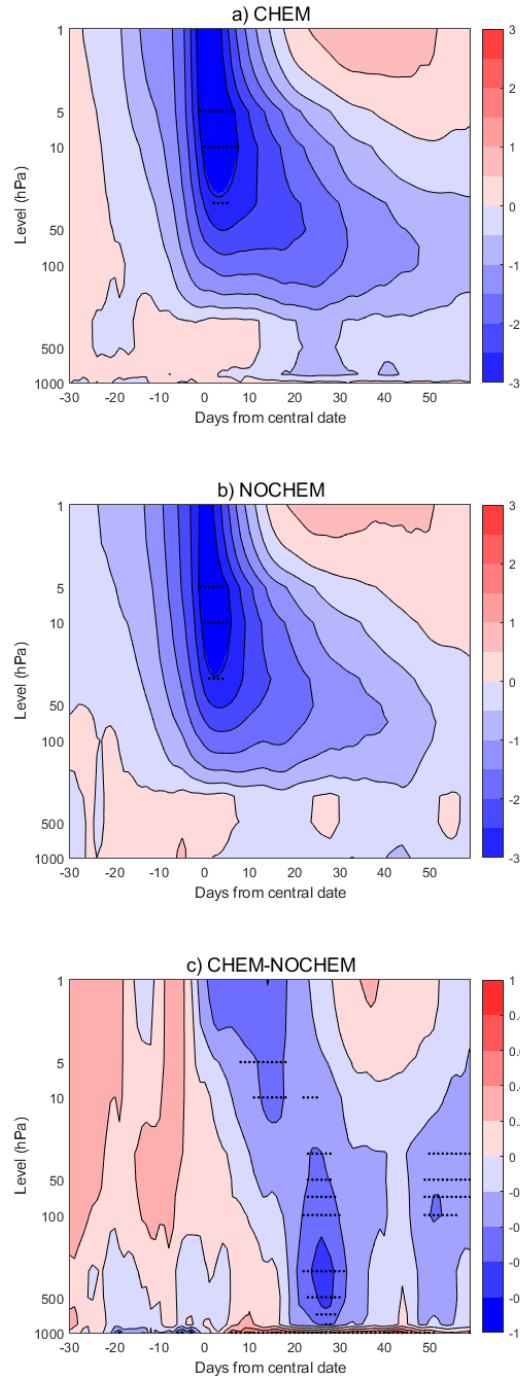

**Figure 4.** NAM anomaly composites around DJF SSW central dates in CHEM (topa), NOCHEM (middleb), CHEM-NOCHEM (bottomc). Stippling shows significance at the 95% level (with a Monte Carlo test for CHEM and NOCHEM and a two-tailed t-test for CHEM-NOCHEM). Contours are every 0.5 standard units for CHEM and NOCHEM and every 0.2 standard units for CHEM-NOCHEM.



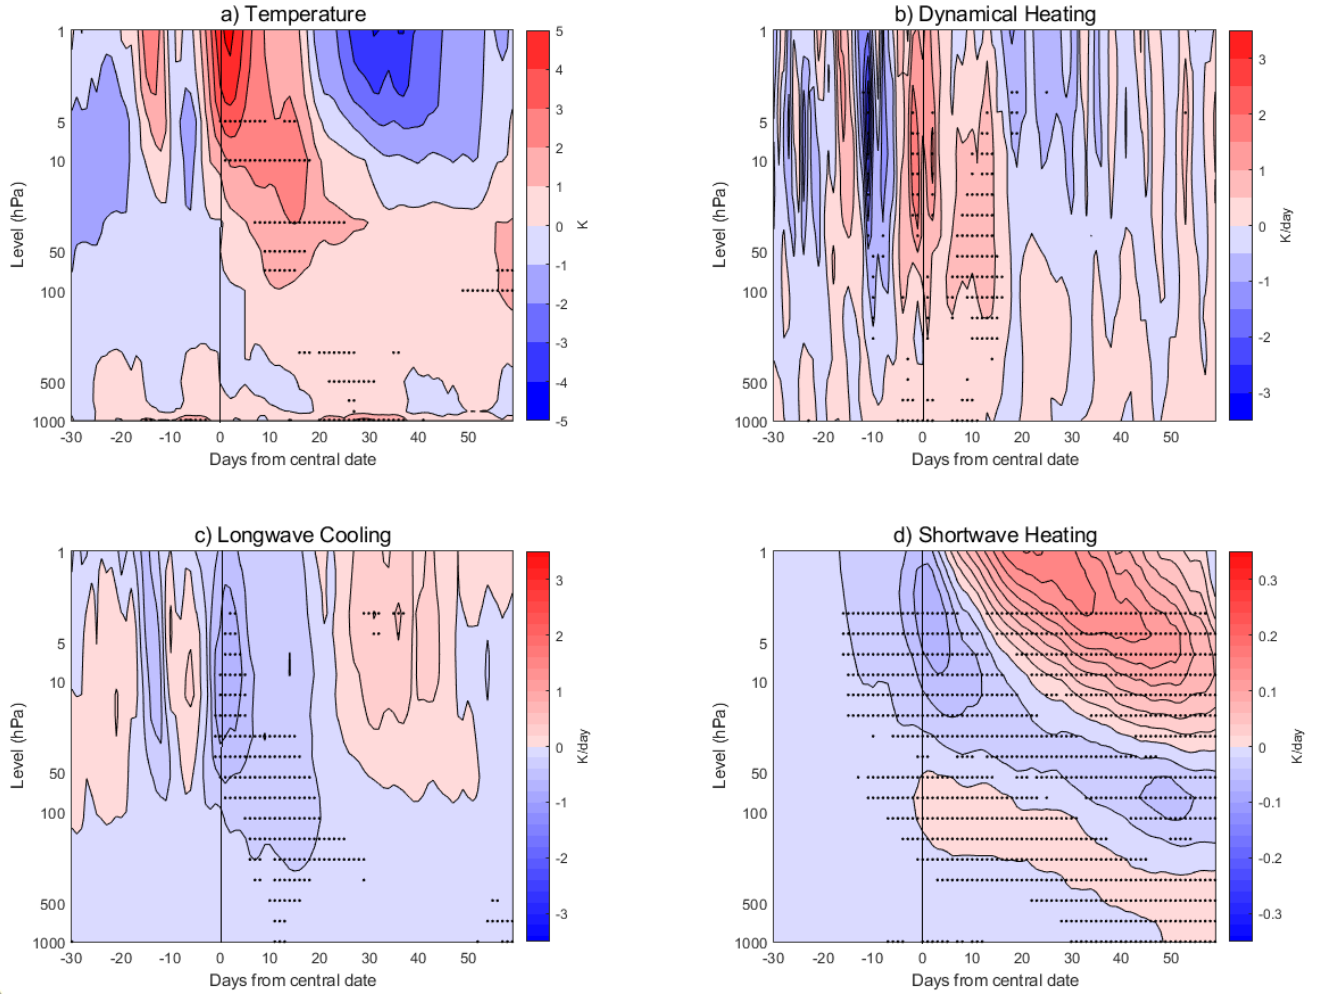

**Figure 5.** CHEM-NOCHEM differences in the temperature and heating anomalies over 60-90° N from -30 to +60 days around the SSW DJF central dates. **Top-left(a):** temperature-Temperature anomalies. Contours are every 1 K. **Top-right(b):** dynamical-Dynamical heating anomalies. Contours are every 0.5 K/day. **Bottom-left(c):** longwave-Longwave heating anomalies. Contours are every 0.25 K/day. **Bottom-right(d):** shortwave-Shortwave heating anomalies. Contours are every 0.02 K/day. Stippling shows significance at the 95% level under a two-tailed t-test.

CHEM-NOCHEM difference

## March SSW 100 hPa Eddy Heat Flux

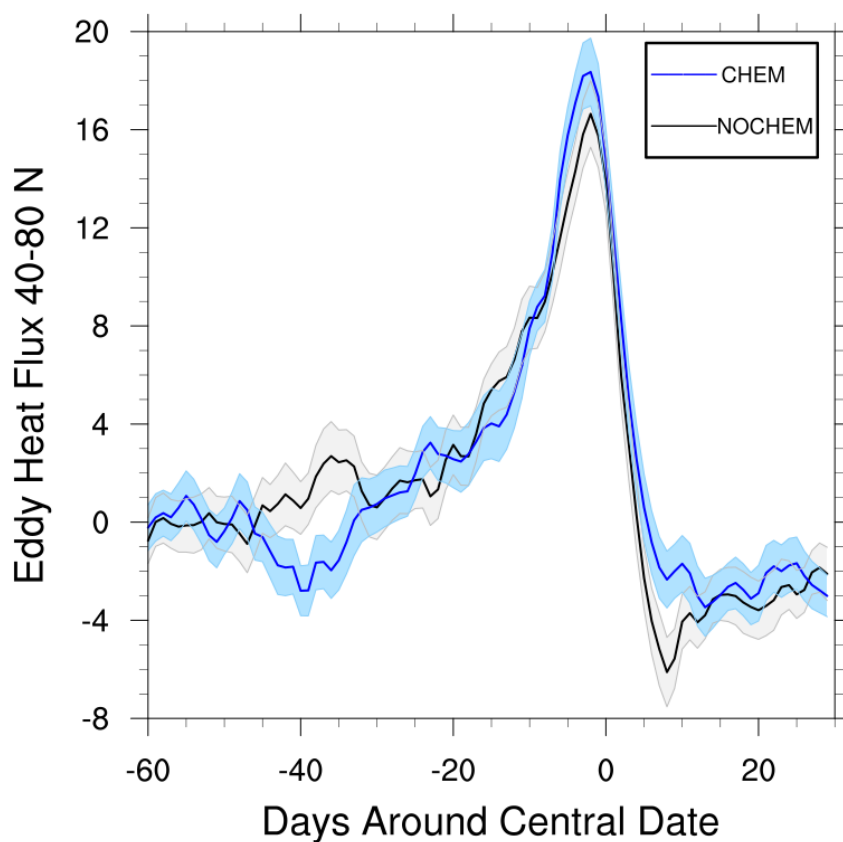

**Figure 6.** Eddy heat flux in shortwave heating anomalies  $\text{mK/s}$  over  $40\text{--}80^\circ\text{ N}$  from  $-30\text{--}60$  to  $+60\text{--}30$  days around the SSW DJF central dates. The CHEM average is in December (top) blue, January (middle) with confidence intervals shown in pale blue. The NOCHEM average is in black, and February (bottom) with confidence intervals shown in gray.

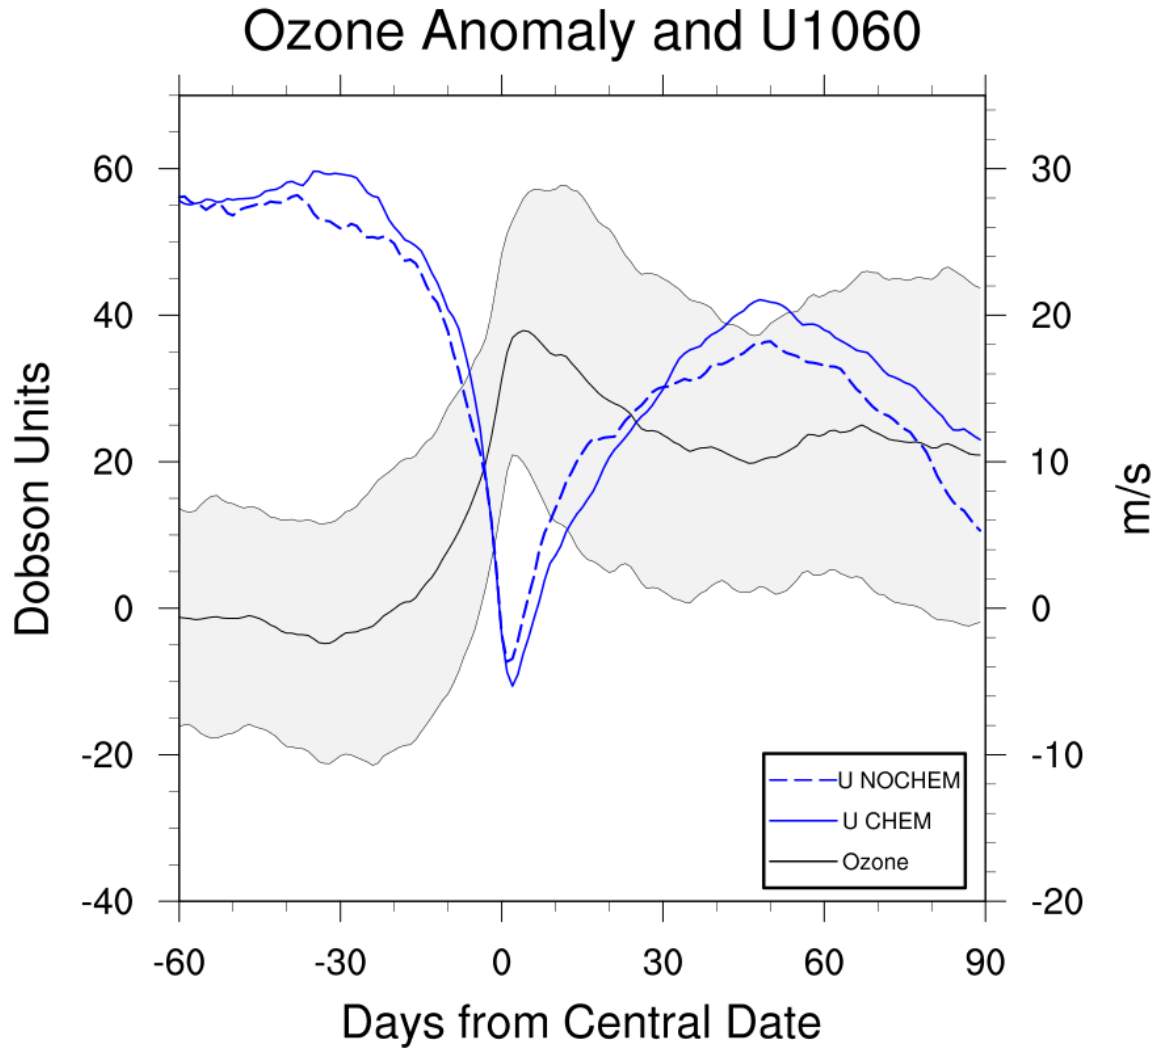

**Figure 7.** Composite of total column polar cap (over 60-90° N) ozone anomalies in Dobson units in the CHEM simulations and composite composites of zonal mean zonal wind at 60° N and 10 hPa in m/s from -60 to 90 days around the central date of DJF SSWs in CHEM simulations and NOCHEM. The black line shows the mean total ozone column;  $1\sigma$  from the mean is shaded. The blue solid and dashed line shows the mean U1060 in CHEM and NOCHEM respectively.

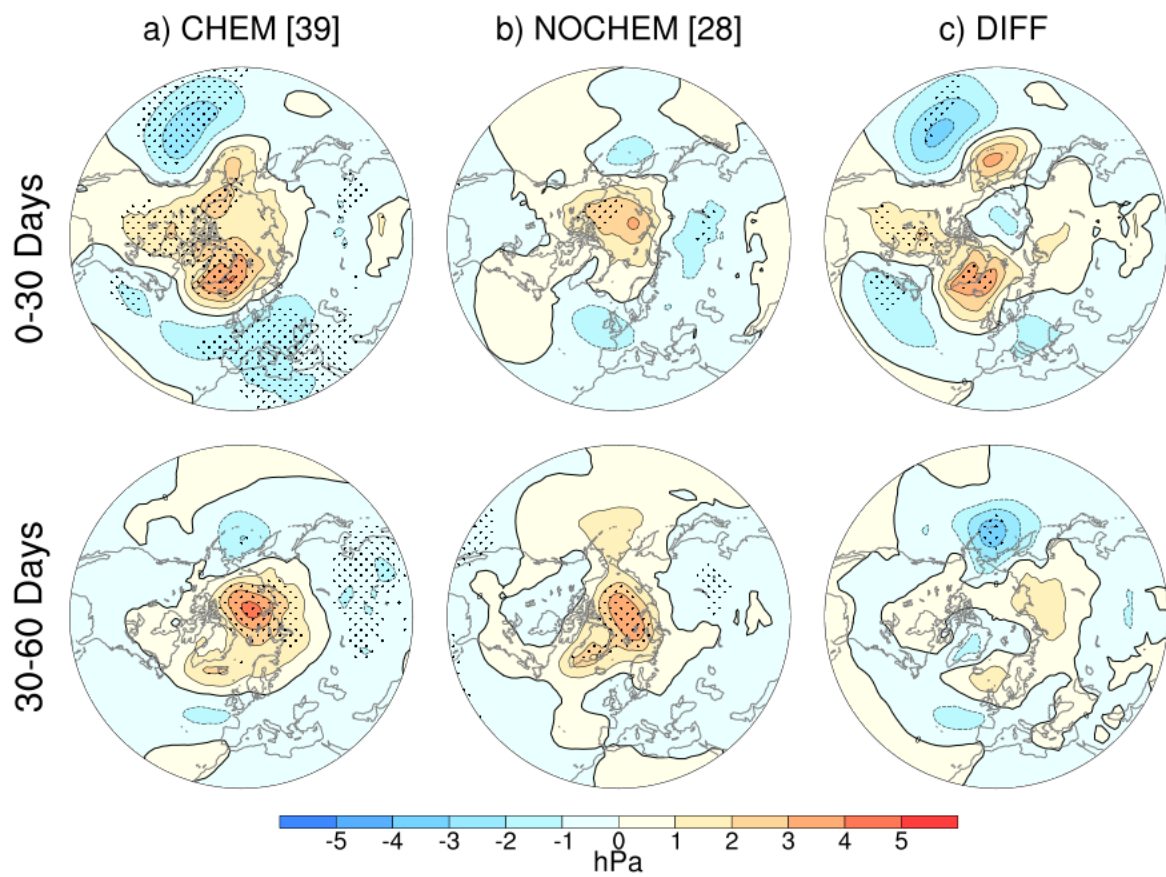

**Figure 8.** As in Figure 3, for March SSWs.

~~As in Figure 4, for March SSWs.~~

~~As in Figure 5, for March SSWs.~~

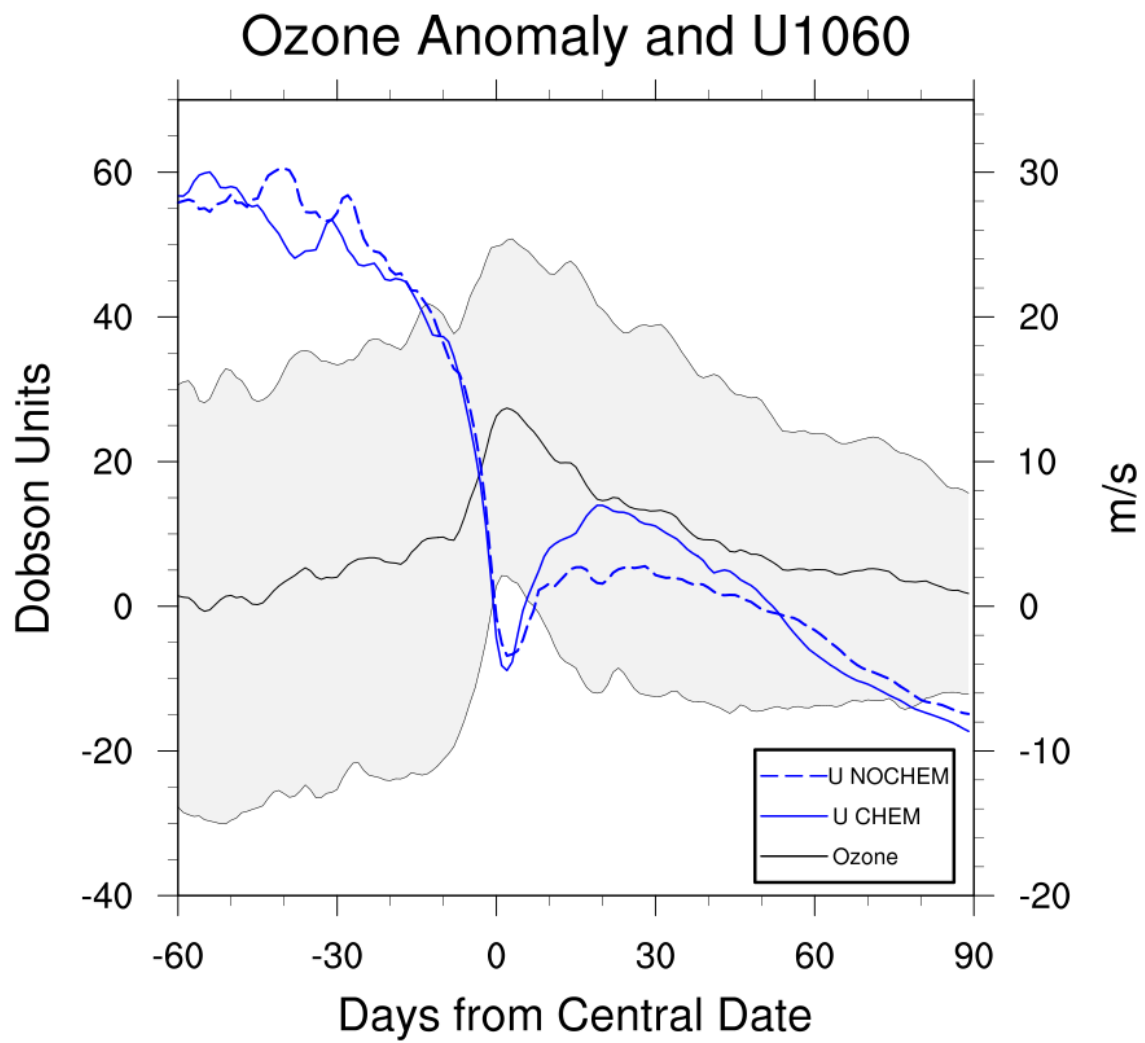

**Figure 9.** As in Figure 7, for March SSWs.

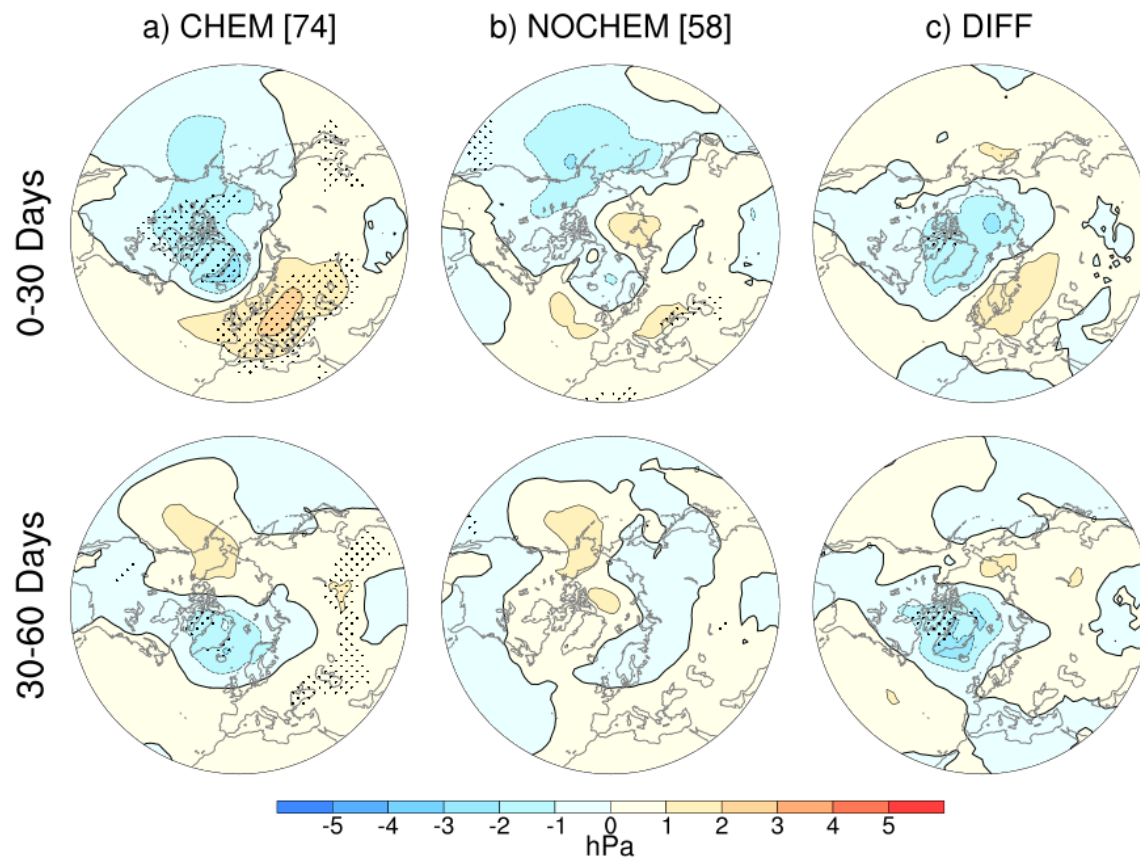

**Figure 10.** As in Figure 3, for DJF SPVs.

As in Figure 4, for DJF SPVs.

As in Figure 5, for DJF SPVs.

475



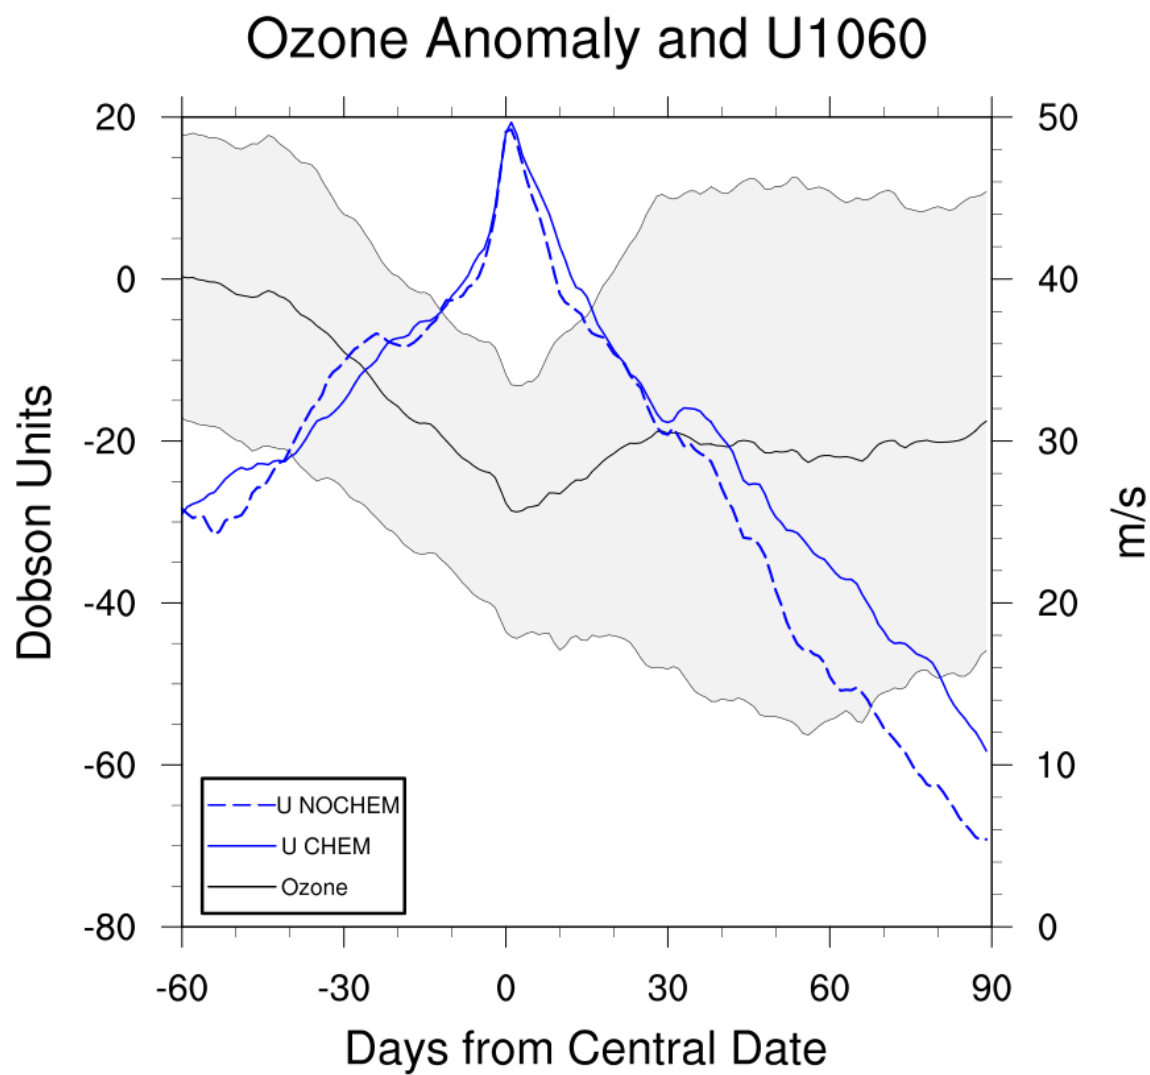

**Figure 11.** As in Figure 7, for DJF SPVs.

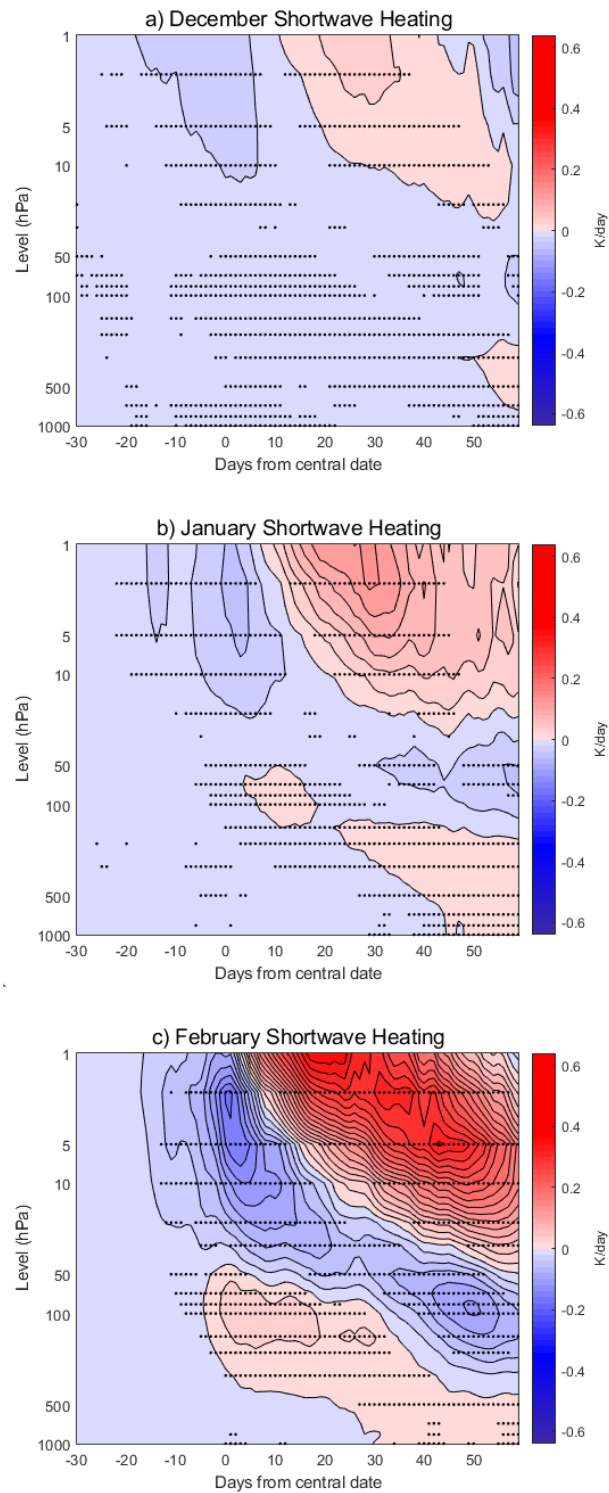

**Figure S1.** CHEM-NOCHEM difference in shortwave heating anomalies from -30 to +60 days around the SSW central dates in December (a), January (b), and February (c).

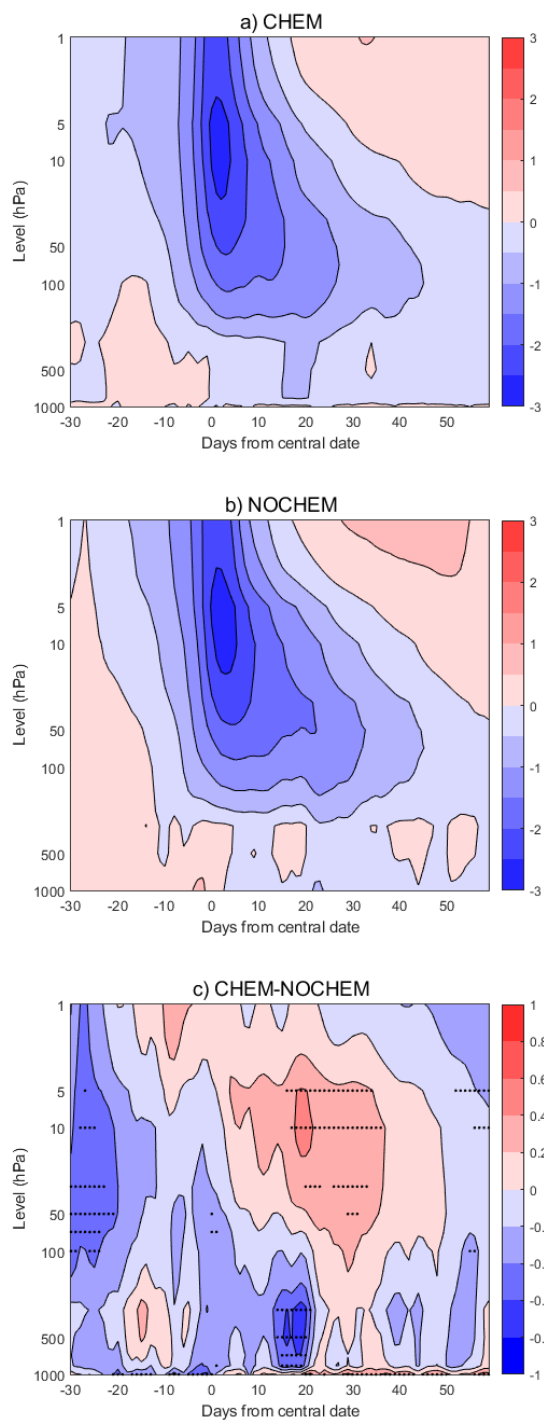

**Figure S2.** As in Figure 4, for March SSWs.

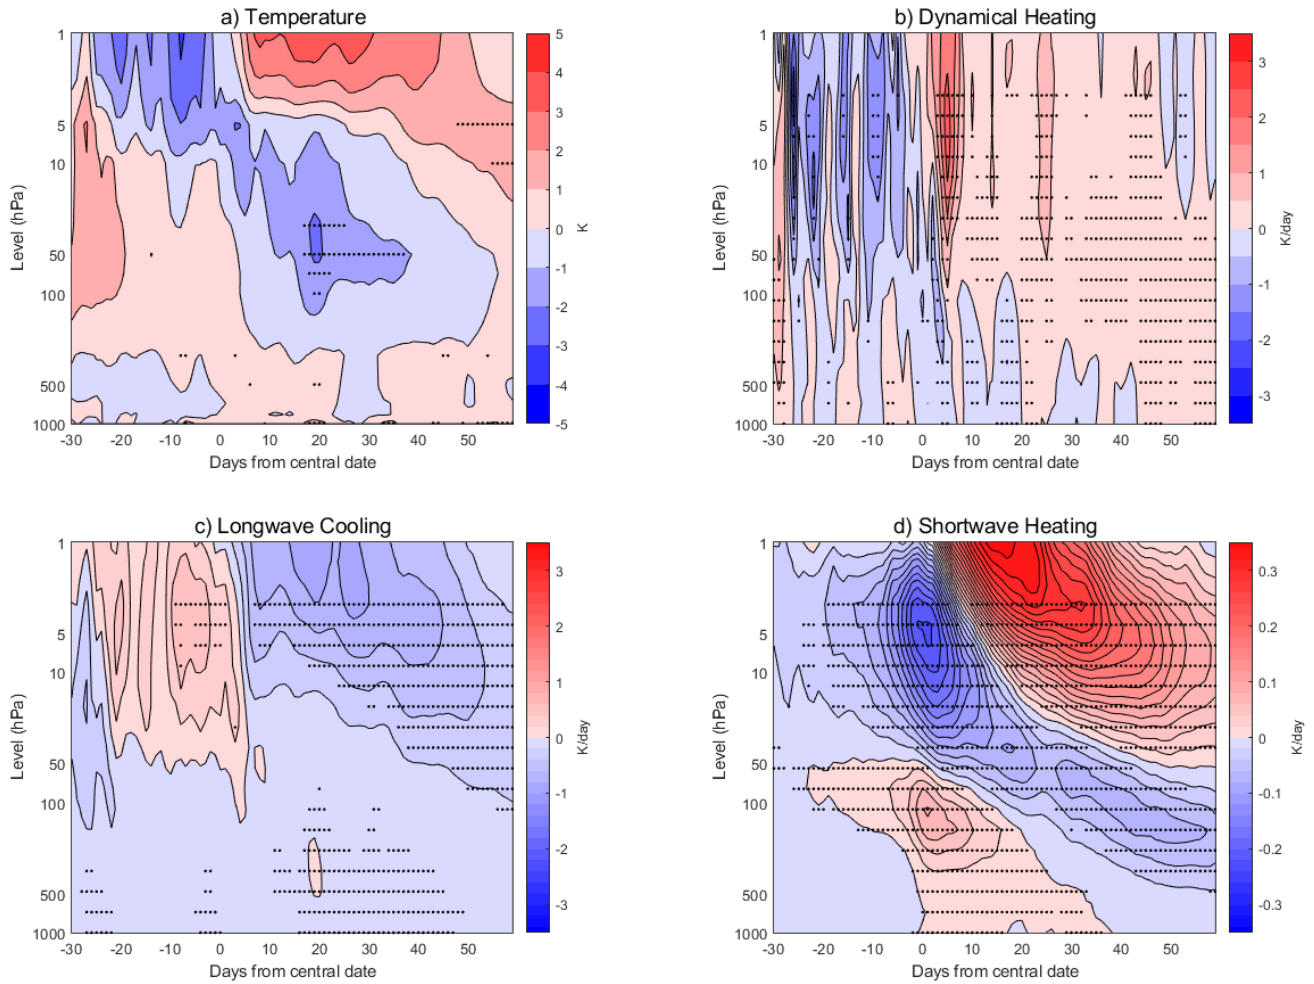

**Figure S3.** As in Figure 5, for March SSWs.

## March SSW 100 hPa Eddy Heat Flux

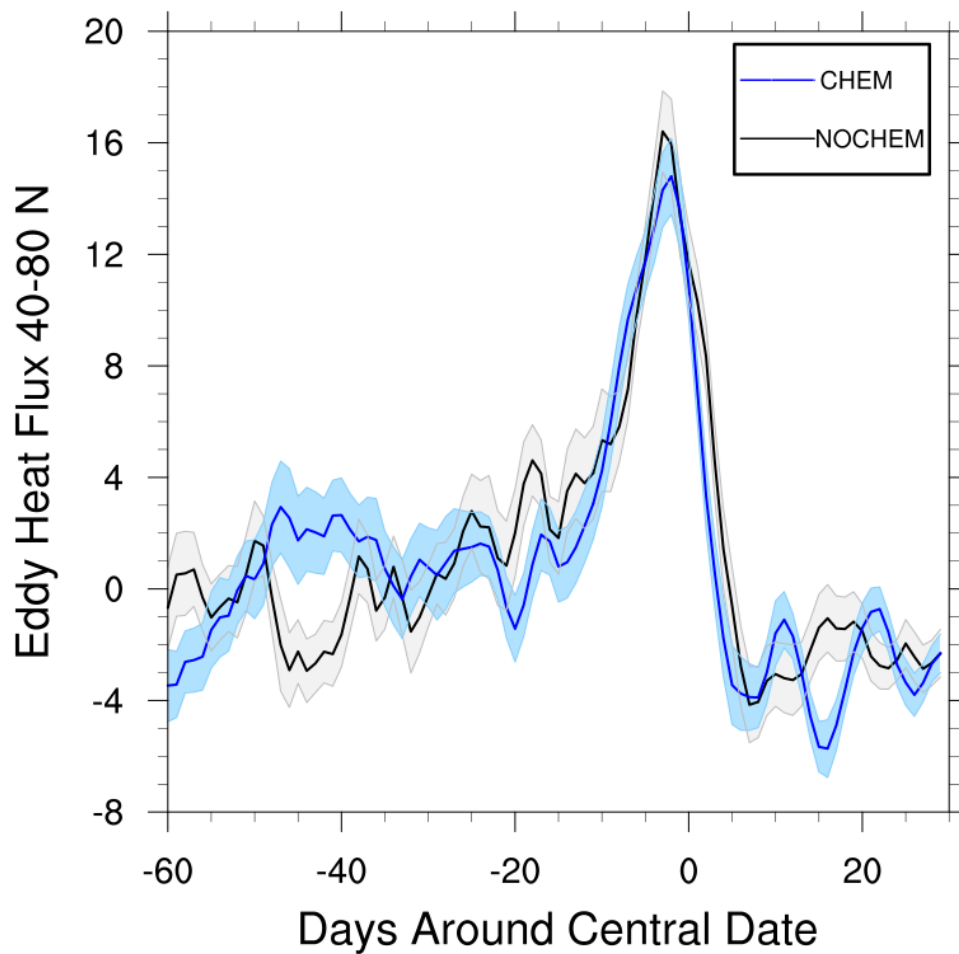

**Figure S4.** As in Figure 6, for March SSWs.

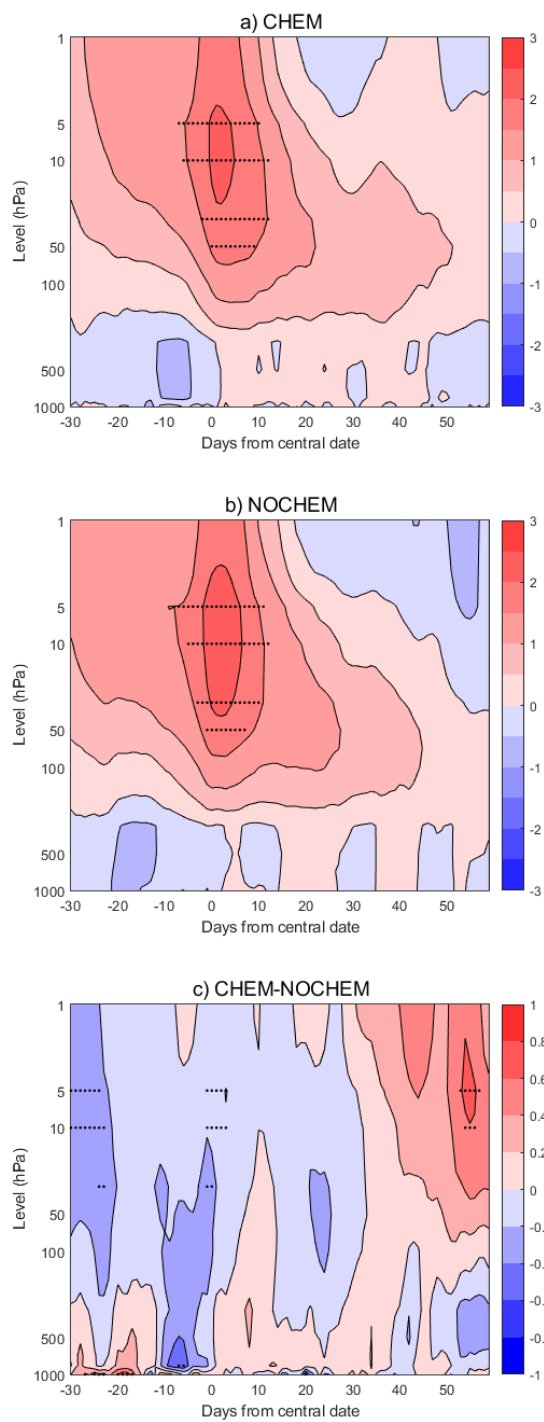

**Figure S5.** As in Figure 4, for DJF SPVs.



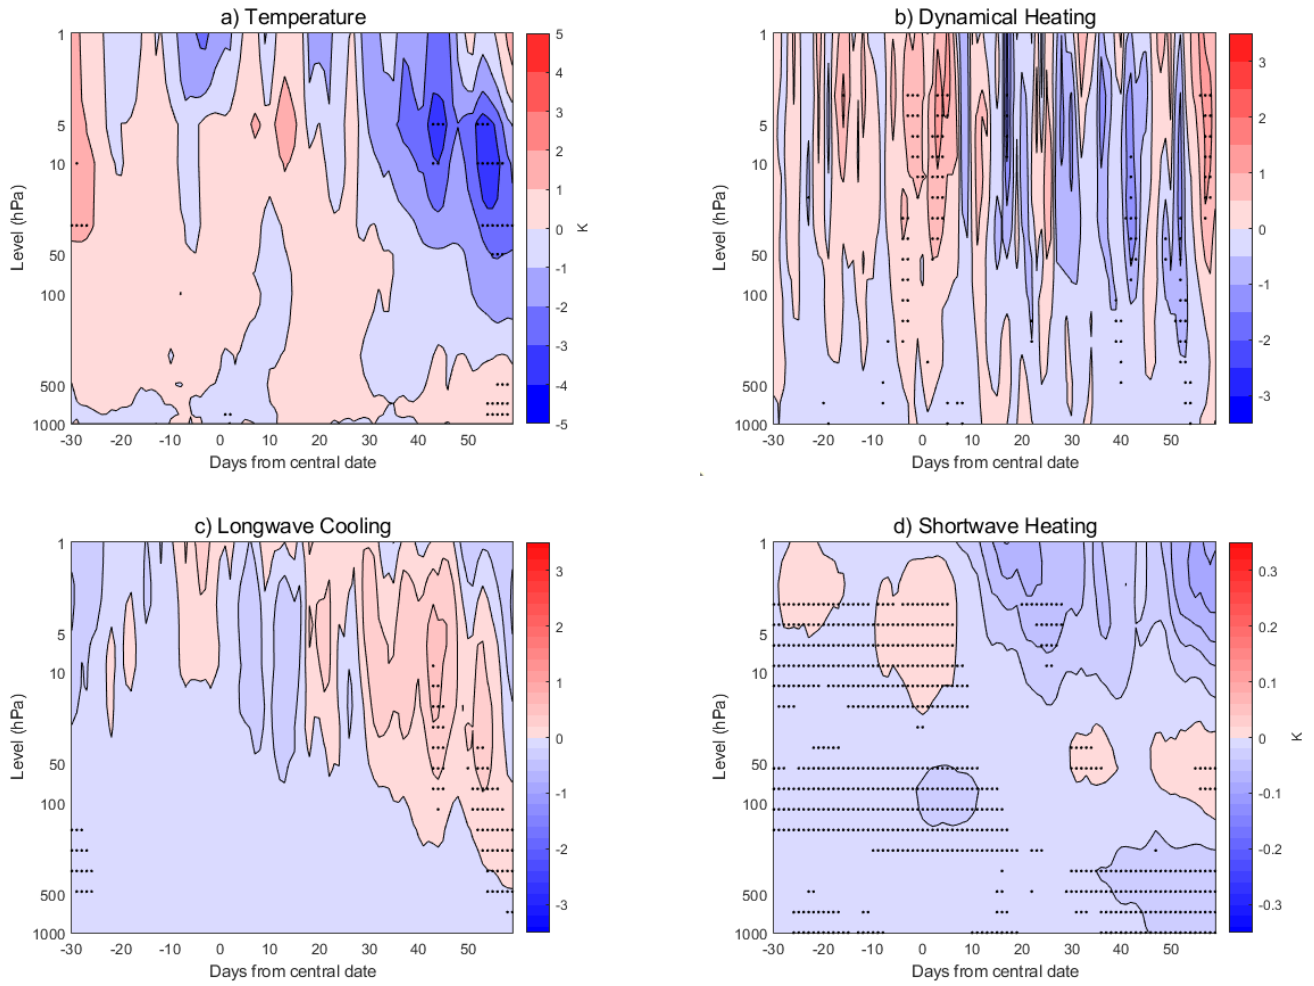

**Figure S6.** As in Figure 5, for DJF SPVs.
